# Supplementary material
Source: PubMed Central journal article supplement (PMC5694968)
Supplement: jp7b09190_si_001.pdf [file jp7b09190_si_001.pdf]

# Supporting Information

## Emergence of Nonlinear Optical Activity by Incorporation of a Linker Carrying the *p*-Nitroaniline Motif in MIL-53 Frameworks

Karen Markey,<sup>a†</sup> Martin Krüger,<sup>b†</sup> Tomasz Seidler,<sup>c,d†</sup> Helge Reinsch,<sup>b</sup> Thierry Verbiest,<sup>e</sup> Dirk E. De Vos,<sup>a</sup> Benoît Champagne,<sup>d</sup> Norbert Stock<sup>b</sup> and Monique A. van der Veen<sup>f</sup>

- a. Centre for Surface Chemistry and Catalysis, Faculty of Bioscience Engineering, University of Leuven, Leuven, Belgium.  
b. Institut für Anorganische Chemie, Christian-Albrechts-Universität zu Kiel, Kiel, Germany.  
c. K. Gumiński Department of Theoretical Chemistry, Jagiellonian University, Romana Ingardena 3, 30-060 Kraków, Poland.  
d. Unité de Chimie Physique Théorique et Structurale, University of Namur, 5000 Namur, Belgium.  
e. Molecular Imaging and Photonics, KU Leuven – University of Leuven, 3001 Leuven, Belgium.  
f. Catalysis Engineering, TU Delft, 2628 Delft, The Netherlands.  
† K. Markey, M. Krüger and T. Seidler contributed equally.

### Contents

|                                                                                                                    |    |
|--------------------------------------------------------------------------------------------------------------------|----|
| Linker synthesis .....                                                                                             | 2  |
| MOF Synthesis .....                                                                                                | 6  |
| XRD patterns and refinements .....                                                                                 | 14 |
| TG curves and elementary analysis .....                                                                            | 20 |
| SEM images .....                                                                                                   | 23 |
| NMR spectra .....                                                                                                  | 27 |
| Sorption experiments .....                                                                                         | 29 |
| SHG microscopy .....                                                                                               | 31 |
| Calculation of $\langle d_{\text{eff}} \rangle$ values .....                                                       | 33 |
| Ab initio calculations .....                                                                                       | 34 |
| Estimation of the transmittance of 400 nm light through MIL-53(Al)-NH <sub>2</sub> -NO <sub>2</sub> crystals ..... | 40 |
| UV-vis spectrum .....                                                                                              | 42 |
| SHG of MIL-53(Al)-NH <sub>2</sub> /NO <sub>2</sub> (1) as a function of temperature .....                          | 43 |
| Bibliography .....                                                                                                 | 44 |

## Linker synthesis

2-Amino-5-nitroterephthalic acid ( $\text{H}_2\text{BDC-NH}_2/\text{NO}_2$ ): The synthesis was accomplished by following the literature procedure published by Skibo et al. The reaction scheme is shown in **Figure S1**.

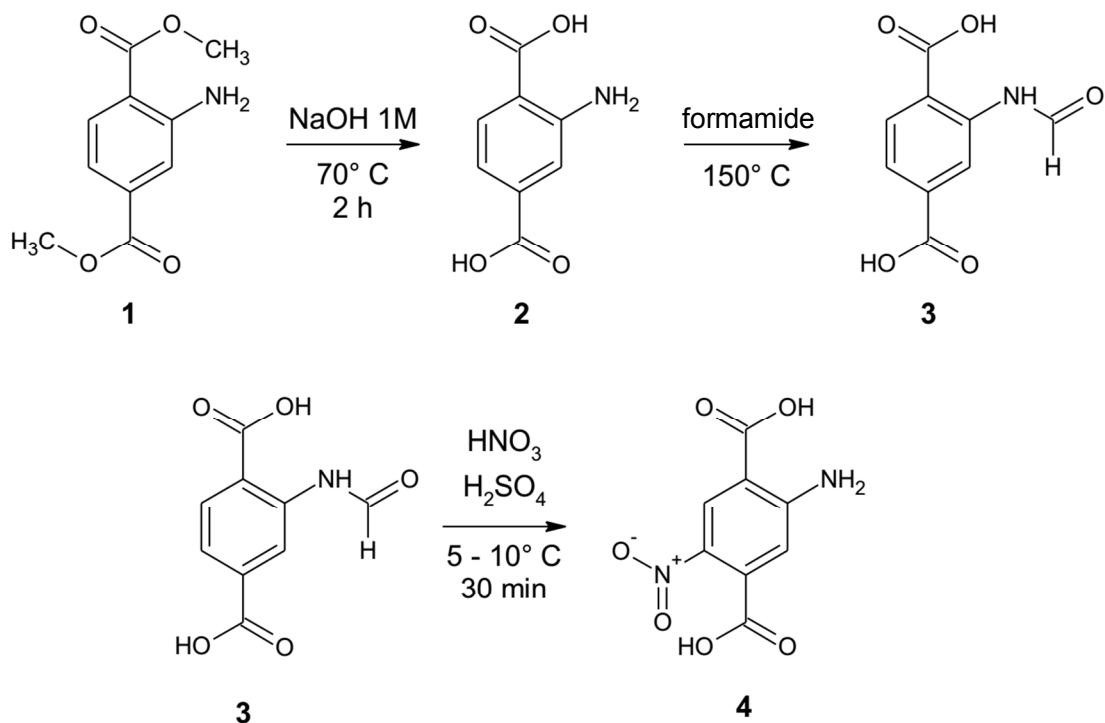

**Figure S1.** Reaction scheme for the synthesis of 2-amino-5-nitroterephthalic acid ( $\text{H}_2\text{BDC-NH}_2/\text{NO}_2$ ).

**Step 1:** A mixture of 87 g (416 mmol) of dimethyl aminoterephthalate and 800 mL of a 1M NaOH solution was heated in a 1 L flask to 70 °C until the solid was dissolved completely. After cooling down to room temperature conc. HCl was added until a yellow solid precipitated which was filtered and washed with water.

Yield: 67 g (370 mmol, 89%)

**<sup>1</sup>H-NMR:** (200 MHz, DMSO-D<sub>6</sub>, 300 K):  $\delta$  [ppm]: 7.77 (1H, d, J = 8.3 Hz, H3), 7.39 (1H, d, J = 1.4 Hz, H1), 7.02 (1H, dd, J = 8.3 Hz, J = 1.6 Hz, H2).

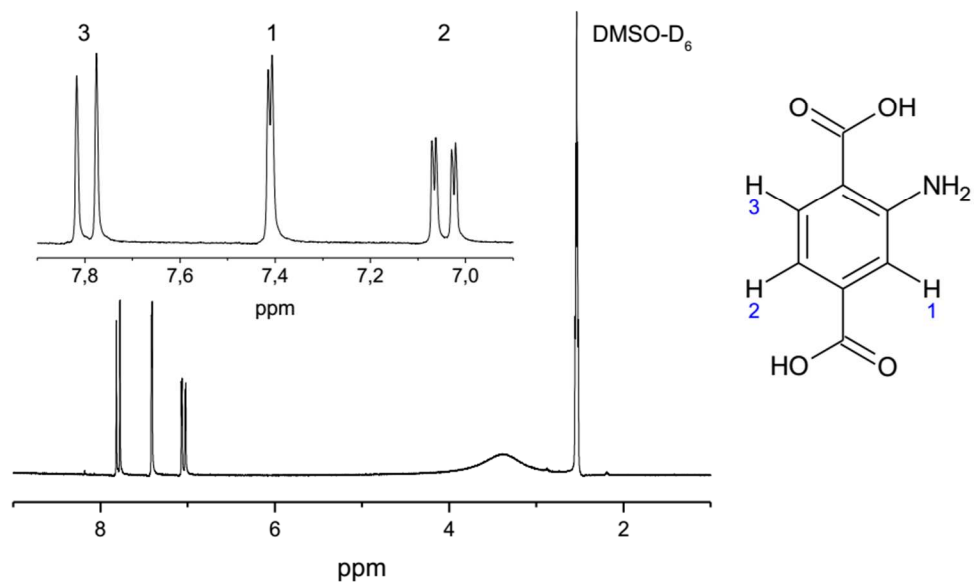

**Figure S2.** <sup>1</sup>H-NMR spectrum of aminoterephthalic acid.

**Step 2:** A suspension of 20.8 g aminoterephthalic acid (114 mmol) and 100 mL formamide was heated rapidly to 150 °C until the solid was dissolved. During cooling down to room temperature a brown solid precipitated which was filtered off and dissolved in a saturated aqueous Na(HCO<sub>3</sub>) solution. While acidifying this solution with conc. acetic acid a white solid precipitated which was filtered off, washed with water and dried completely.

Yield: 9.7 g (53 mmol, 48%)

**<sup>1</sup>H-NMR:** (200 MHz, DMSO-D<sub>6</sub>, 300 K): δ [ppm]: 9.1 (1H, s H1), 8.54 (1H, s H2), 8.07 (1H, d, J = 8.2 Hz, H4), 7.69 (1H dd, J = 8.2 Hz, J = 1.7 Hz, H3)

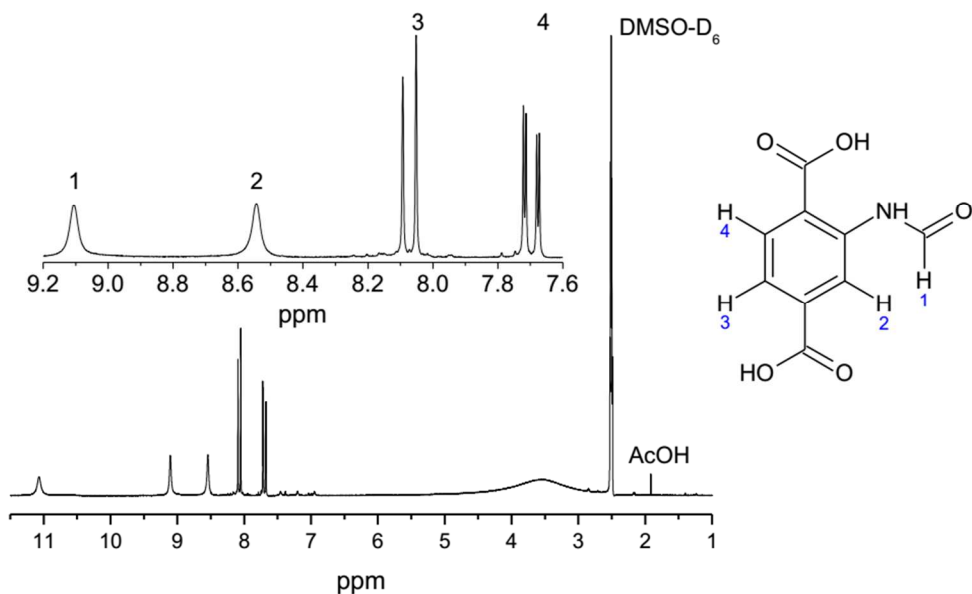

**Figure S3.**  $^1\text{H-NMR}$  spectrum of formamidoterephthalic acid.

**Step 3:** To 20 mL of fuming nitric acid, cooled in an ice bath, 5.1 g (24 mmol) of formamidoterephthalic acid was added under stirring. To this suspension 10 mL of conc. sulfuric acid, which was also cooled in an ice bath, was added slowly within 15-20 minutes keeping the temperature between 5-10°C. After addition, the solid was dissolved and the solution was purged on 100 g of ice and stored in a refrigerator overnight. The precipitated solid was filtered off and recrystallized from hot water. Orange-brown crystals were obtained.

Yield: 1.5 g (6.6 mmol, 27%)

$^1\text{H-NMR}$ : (200 MHz, DMSO- $\text{D}_6$ , 300 K):  $\delta$  [ppm]: 8.49 (1H, s, H1), 6.89 (1H, s, H2).

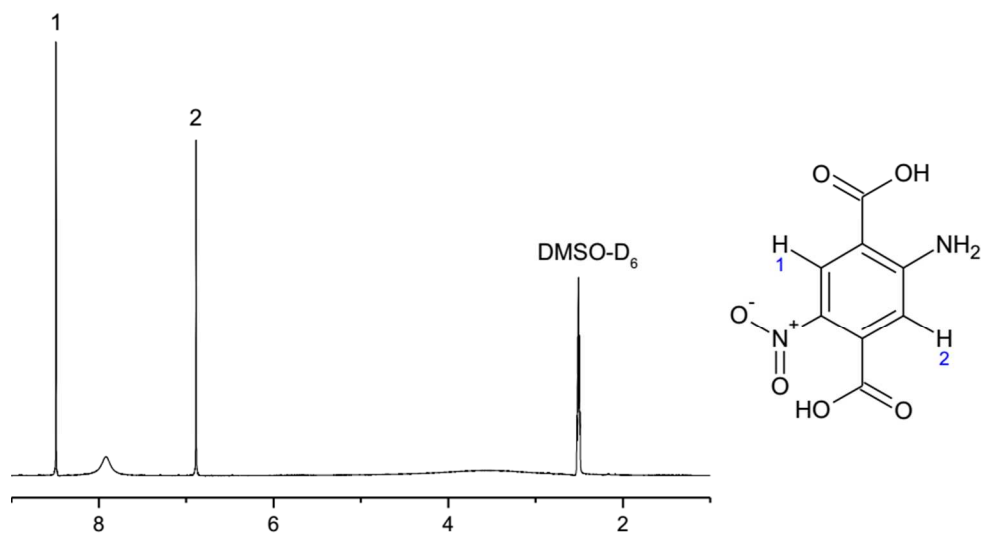

**Figure S4.**  $^1\text{H-NMR}$  spectrum of 2-amino-5-nitroterephthalic acid ( $\text{H}_2\text{BDC-NH}_2/\text{NO}_2$ ) measured in DMSO- $\text{D}_6$ .

$^1\text{H-NMR}$ : (200 MHz, NaOD/ $\text{D}_2\text{O}$ , 300 K):  $\delta$  [ppm]: 8.36 (1H, s, H1), 6.41 (1H, s, H2).



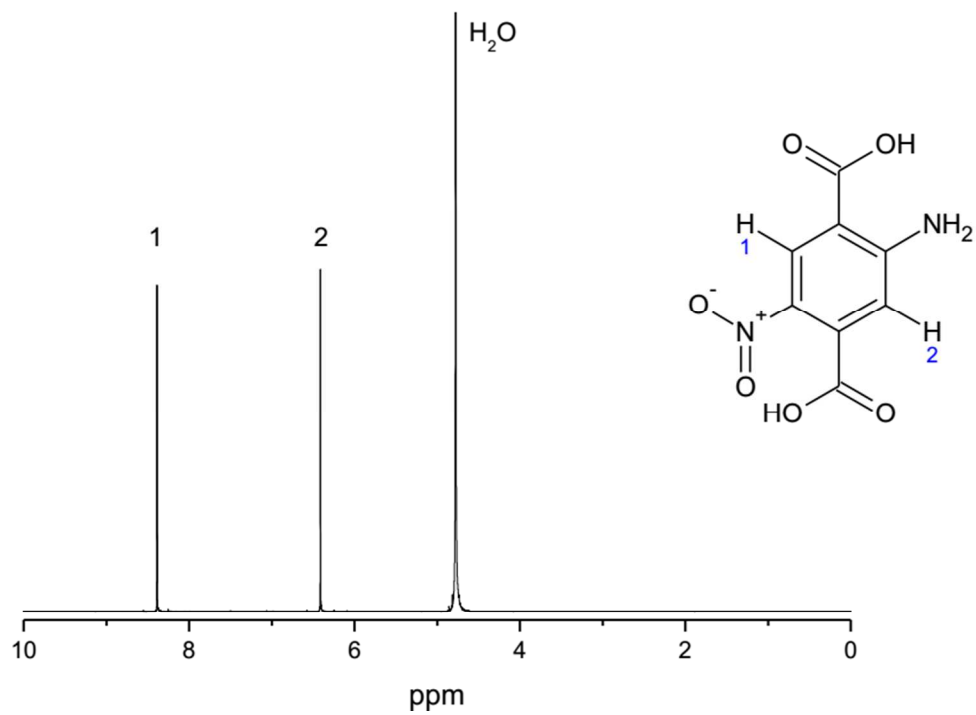

**Figure S5.** <sup>1</sup>H-NMR spectrum of 2-amino-5-nitroterephthalic acid (H<sub>2</sub>BDC-NH<sub>2</sub>/NO<sub>2</sub>) measured in 5% NaOD/D<sub>2</sub>O.

# MOF Synthesis

**Table S1.** Molar ratios and exact amounts of the reactants employed in the HT experiments for MIL-53(Al)-NH<sub>2</sub>/NO<sub>2</sub>.

| metal source                                                                 | No. | equivalent linker | equivalent Al <sup>3+</sup> | additive [μL/mg] | linker [mg] | Al <sup>3+</sup> [μL/mg] | V H <sub>2</sub> O [μL] | V DMF [μL] | temperature program |
|------------------------------------------------------------------------------|-----|-------------------|-----------------------------|------------------|-------------|--------------------------|-------------------------|------------|---------------------|
| 2 M AlCl <sub>3</sub> ·6H <sub>2</sub> O in H <sub>2</sub> O                 | 1   | 2                 | 1                           | 0                | 20.0        | 22.1                     | 477.9                   | 0.0        | 1h/12h\1h 160°C     |
|                                                                              | 2   | 2                 | 2                           | 0                | 20.0        | 44.2                     | 455.8                   | 0.0        |                     |
|                                                                              | 3   | 2                 | 3                           | 0                | 20.0        | 66.4                     | 433.6                   | 0.0        |                     |
|                                                                              | 4   | 3                 | 2                           | 0                | 30.0        | 44.2                     | 455.8                   | 0.0        |                     |
|                                                                              | 5   | 3                 | 3                           | 0                | 30.0        | 66.4                     | 433.6                   | 0.0        |                     |
|                                                                              | 6   | 3                 | 4                           | 0                | 30.0        | 88.5                     | 411.5                   | 0.0        |                     |
| 2 M Al(NO <sub>3</sub> ) <sub>3</sub> ·9H <sub>2</sub> O in H <sub>2</sub> O | 7   | 2                 | 1                           | 0                | 20.0        | 22.1                     | 477.9                   | 0.0        |                     |
|                                                                              | 8   | 2                 | 2                           | 0                | 20.0        | 44.2                     | 455.8                   | 0.0        |                     |
|                                                                              | 9   | 2                 | 3                           | 0                | 20.0        | 66.4                     | 433.6                   | 0.0        |                     |
|                                                                              | 10  | 3                 | 2                           | 0                | 30.0        | 44.2                     | 455.8                   | 0.0        |                     |
|                                                                              | 11  | 3                 | 3                           | 0                | 30.0        | 66.4                     | 433.6                   | 0.0        |                     |
|                                                                              | 12  | 3                 | 4                           | 0                | 30.0        | 88.5                     | 411.5                   | 0.0        |                     |
| 2 M AlCl <sub>3</sub> ·6H <sub>2</sub> O in H <sub>2</sub> O                 | 13  | 1                 | 1                           | 0                | 10.0        | 22.1                     | 127.9                   | 0.0        | 1h/12h\1h 180°C     |
|                                                                              | 14  | 1                 | 2                           | 0                | 10.0        | 44.2                     | 105.8                   | 0.0        |                     |
|                                                                              | 15  | 1                 | 4                           | 0                | 10.0        | 88.5                     | 61.5                    | 0.0        |                     |
|                                                                              | 16  | 2                 | 0.5                         | 0                | 20.0        | 11.1                     | 138.9                   | 0.0        |                     |
|                                                                              | 17  | 2                 | 1                           | 0                | 20.0        | 22.1                     | 127.9                   | 0.0        |                     |
|                                                                              | 18  | 2                 | 2                           | 0                | 20.0        | 44.2                     | 105.8                   | 0.0        |                     |
|                                                                              | 19  | 2                 | 2                           | 0                | 20.0        | 44.2                     | 105.8                   | 0.0        |                     |
|                                                                              | 20  | 2                 | 2                           | 0                | 20.0        | 44.2                     | 85.8                    | 20.0       |                     |
|                                                                              | 21  | 2                 | 2                           | 0                | 20.0        | 44.2                     | 65.8                    | 40.0       |                     |
|                                                                              | 22  | 2                 | 2                           | 0                | 20.0        | 44.2                     | 45.8                    | 60.0       |                     |
|                                                                              | 23  | 2                 | 2                           | 0                | 20.0        | 44.2                     | 25.8                    | 80.0       |                     |
|                                                                              | 24  | 2                 | 2                           | 0                | 20.0        | 44.2                     | 5.8                     | 100.0      |                     |
|                                                                              | 25  | 1                 | 1                           | 0                | 10.0        | 22.1                     | 277.9                   | 200.0      |                     |
|                                                                              | 26  | 1                 | 2                           | 0                | 10.0        | 44.2                     | 255.8                   | 200.0      |                     |
|                                                                              | 27  | 1                 | 3                           | 0                | 10.0        | 66.4                     | 233.6                   | 200.0      |                     |
|                                                                              | 28  | 2                 | 0.5                         | 0                | 20.0        | 11.1                     | 288.9                   | 200.0      |                     |
|                                                                              | 29  | 2                 | 1                           | 0                | 20.0        | 22.1                     | 277.9                   | 200.0      |                     |
|                                                                              | 30  | 2                 | 2                           | 0                | 20.0        | 44.2                     | 255.8                   | 200.0      |                     |
| AlCl <sub>3</sub> ·6H <sub>2</sub> O                                         | 31  | 1                 | 1                           | 0                | 10.0        | 10.7                     | 300.0                   | 200.0      |                     |
|                                                                              | 32  | 1                 | 2                           | 0                | 10.0        | 21.4                     | 300.0                   | 200.0      |                     |
|                                                                              | 33  | 1                 | 3                           | 0                | 10.0        | 32.0                     | 300.0                   | 200.0      |                     |
|                                                                              | 34  | 2                 | 0.5                         | 0                | 20.0        | 5.3                      | 300.0                   | 200.0      |                     |
|                                                                              | 35  | 2                 | 1                           | 0                | 20.0        | 10.7                     | 300.0                   | 200.0      |                     |
|                                                                              | 36  | 2                 | 2                           | 0                | 20.0        | 21.4                     | 300.0                   | 200.0      |                     |
|                                                                              |     |                   |                             |                  |             |                          |                         |            |                     |

|                                                               |    |   |     | 2M NaOH [μL] |      |      |       |       |                    |
|---------------------------------------------------------------|----|---|-----|--------------|------|------|-------|-------|--------------------|
|                                                               | 37 | 2 | 2   | 4.4          | 20.0 | 21.4 | 295.6 | 200.0 |                    |
|                                                               | 38 | 2 | 2   | 8.8          | 20.0 | 21.4 | 291.2 | 200.0 |                    |
|                                                               | 39 | 2 | 2   | 13.3         | 20.0 | 21.4 | 286.7 | 200.0 |                    |
|                                                               | 40 | 2 | 2   | 17.7         | 20.0 | 21.4 | 282.3 | 200.0 |                    |
|                                                               | 41 | 2 | 2   | 22.1         | 20.0 | 21.4 | 277.9 | 200.0 |                    |
|                                                               | 42 | 2 | 2   | 26.5         | 20.0 | 21.4 | 273.5 | 200.0 |                    |
| 2 M AlCl <sub>3</sub> · 6H <sub>2</sub> O in H <sub>2</sub> O | 43 | 1 | 1   | 0            | 10.0 | 22.1 | 67.9  | 60.0  |                    |
|                                                               | 44 | 1 | 2   | 0            | 10.0 | 44.2 | 45.8  | 60.0  |                    |
|                                                               | 45 | 1 | 3   | 0            | 10.0 | 66.4 | 23.6  | 60.0  |                    |
|                                                               | 46 | 2 | 0.5 | 0            | 20.0 | 11.1 | 78.9  | 60.0  |                    |
|                                                               | 47 | 2 | 1   | 0            | 20.0 | 22.1 | 67.9  | 60.0  |                    |
|                                                               | 48 | 2 | 2   | 0            | 20.0 | 44.2 | 45.8  | 60.0  |                    |
| AlCl <sub>3</sub> · 6H <sub>2</sub> O                         | 49 | 1 | 1   | 10           | 10.0 | 10.7 | 90.0  | 60.0  |                    |
|                                                               | 50 | 1 | 2   | 10           | 10.0 | 21.4 | 90.0  | 60.0  |                    |
|                                                               | 51 | 1 | 3   | 10           | 10.0 | 32.0 | 90.0  | 60.0  |                    |
|                                                               | 52 | 2 | 0.5 | 10           | 20.0 | 5.3  | 90.0  | 60.0  |                    |
|                                                               | 53 | 2 | 1   | 10           | 20.0 | 10.7 | 90.0  | 60.0  |                    |
|                                                               | 54 | 2 | 2   | 10           | 20.0 | 21.4 | 90.0  | 60.0  |                    |
|                                                               | 55 | 2 | 2   | 8.8          | 20.0 | 21.4 | 81.2  | 60.0  |                    |
|                                                               | 56 | 2 | 2   | 17.7         | 20.0 | 21.4 | 72.3  | 60.0  |                    |
|                                                               | 57 | 2 | 2   | 26.5         | 20.0 | 21.4 | 63.5  | 60.0  |                    |
|                                                               | 58 | 2 | 2   | 35.4         | 20.0 | 21.4 | 54.6  | 60.0  |                    |
|                                                               | 59 | 2 | 2   | 44.2         | 20.0 | 21.4 | 45.8  | 60.0  |                    |
|                                                               | 60 | 2 | 2   | 53.1         | 20.0 | 21.4 | 36.9  | 60.0  |                    |
| 2 M AlCl <sub>3</sub> · 6H <sub>2</sub> O in H <sub>2</sub> O | 61 | 2 | 2   | 13.3         | 20.0 | 44.2 | 32.5  | 60.0  | 1h/12h\1h<br>150°C |
|                                                               | 62 | 2 | 2   | 22.1         | 20.0 | 44.2 | 23.6  | 60.0  |                    |
|                                                               | 63 | 3 | 3   | 0.0          | 30.0 | 66.4 | 23.6  | 60.0  |                    |
|                                                               | 64 | 3 | 3   | 17.7         | 30.0 | 66.4 | 5.9   | 60.0  |                    |
| AlCl <sub>3</sub> · 6H <sub>2</sub> O                         | 65 | 3 | 3   | 26.5         | 30.0 | 32.0 | 63.5  | 60.0  | 1h/36h\1h<br>150°C |
|                                                               | 66 | 3 | 3   | 35.4         | 30.0 | 32.0 | 54.6  | 60.0  |                    |
| 2 M AlCl <sub>3</sub> · 6H <sub>2</sub> O in H <sub>2</sub> O | 67 | 2 | 2   | 13.3         | 20.0 | 44.2 | 32.5  | 60.0  | 1h/36h\1h<br>150°C |
|                                                               | 68 | 2 | 2   | 22.1         | 20.0 | 44.2 | 23.6  | 60.0  |                    |
|                                                               | 69 | 3 | 3   | 0.0          | 30.0 | 66.4 | 23.6  | 60.0  |                    |
|                                                               | 70 | 3 | 3   | 17.7         | 30.0 | 66.4 | 5.9   | 60.0  |                    |
| AlCl <sub>3</sub> · 6H <sub>2</sub> O                         | 71 | 3 | 3   | 26.5         | 30.0 | 32.0 | 63.5  | 60.0  |                    |
|                                                               | 72 | 3 | 3   | 35.4         | 30.0 | 32.0 | 54.6  | 60.0  |                    |

**Table S2.** Molar ratios and exact amounts of the reactants employed in the HT experiments for MIL-53(Al)-NH<sub>2</sub>/NO<sub>2</sub> (2).

| metal source                         | No. | equivalent linker | equivalent Al <sup>3+</sup> | additive [μL/mg] | linker [mg] | Al <sup>3+</sup> [μL/mg] | V H <sub>2</sub> O [μL] | V EtOH [μL] | temperature program |
|--------------------------------------|-----|-------------------|-----------------------------|------------------|-------------|--------------------------|-------------------------|-------------|---------------------|
| AlCl <sub>3</sub> ·6H <sub>2</sub> O | 1   | 2                 | 2                           | 0                | 20.0        | 21.4                     | 125.0                   | 25.0        | 1h/36h\1h 150°C     |
|                                      | 2   | 2                 | 2                           | 0                | 20.0        | 21.4                     | 100.0                   | 50.0        |                     |
|                                      | 3   | 2                 | 2                           | 0                | 20.0        | 21.4                     | 75.0                    | 75.0        |                     |
|                                      | 4   | 2                 | 2                           | 0                | 20.0        | 21.4                     | 50.0                    | 100.0       |                     |
|                                      | 5   | 2                 | 2                           | 0                | 20.0        | 21.4                     | 25.0                    | 125.0       |                     |
|                                      | 6   | 2                 | 2                           | 0                | 20.0        | 21.4                     | 0.0                     | 150.0       |                     |
|                                      | 7   | 2                 | 2                           | 0                | 20.0        | 21.4                     | 10.0                    | 140.0       |                     |
|                                      | 8   | 2                 | 2                           | 0                | 20.0        | 21.4                     | 15.0                    | 135.0       |                     |
|                                      | 9   | 2                 | 2                           | 0                | 20.0        | 21.4                     | 20.0                    | 130.0       |                     |
|                                      | 10  | 2                 | 2                           | 0                | 20.0        | 21.4                     | 25.0                    | 125.0       |                     |
|                                      | 11  | 2                 | 2                           | 0                | 20.0        | 21.4                     | 30.0                    | 120.0       |                     |
|                                      | 12  | 2                 | 2                           | 0                | 20.0        | 21.4                     | 35.0                    | 115.0       |                     |

**Table S3.** Molar ratios and exact amounts of the reactants employed in the HT experiments for MIL-53(Ga)-NH<sub>2</sub>/NO<sub>2</sub>.

| metal source                                                               | No. | equivalent linker | equivalent Ga <sup>3+</sup> | additive [μL/mg] | linker [mg] | Ga <sup>3+</sup> [μL/mg] | V EtOH [μL] | V H <sub>2</sub> O [μL] | temperature program |
|----------------------------------------------------------------------------|-----|-------------------|-----------------------------|------------------|-------------|--------------------------|-------------|-------------------------|---------------------|
| 2M Ga(NO <sub>3</sub> ) <sub>3</sub> ·H <sub>2</sub> O in H <sub>2</sub> O | 1   | 1                 | 0.5                         | 0                | 10.0        | 11.1                     | 10.0        | 128.9                   | 1h/36h\1h 150°C     |
|                                                                            | 2   | 1                 | 1                           | 0                | 10.0        | 22.1                     | 10.0        | 117.9                   |                     |
|                                                                            | 3   | 1                 | 2                           | 0                | 10.0        | 44.2                     | 10.0        | 95.8                    |                     |
|                                                                            | 4   | 2                 | 1                           | 0                | 20.0        | 22.1                     | 10.0        | 117.9                   |                     |
|                                                                            | 5   | 2                 | 2                           | 0                | 20.0        | 44.2                     | 10.0        | 95.8                    |                     |
|                                                                            | 6   | 2                 | 4                           | 0                | 20.0        | 88.5                     | 10.0        | 51.5                    |                     |
|                                                                            | 7   | 1                 | 0.5                         | 0                | 10.0        | 11.1                     | 20.0        | 118.9                   |                     |
|                                                                            | 8   | 1                 | 1                           | 0                | 10.0        | 22.1                     | 20.0        | 107.9                   |                     |
|                                                                            | 9   | 1                 | 2                           | 0                | 10.0        | 44.2                     | 20.0        | 85.8                    |                     |
|                                                                            | 10  | 2                 | 1                           | 0                | 20.0        | 22.1                     | 20.0        | 107.9                   |                     |
|                                                                            | 11  | 2                 | 2                           | 0                | 20.0        | 44.2                     | 20.0        | 85.8                    |                     |
|                                                                            | 12  | 2                 | 4                           | 0                | 20.0        | 88.5                     | 20.0        | 41.5                    |                     |
|                                                                            | 13  | 1                 | 0.5                         | 0                | 10.0        | 11.1                     | 40.0        | 98.9                    | 8h/16h\4h 150°C     |
|                                                                            | 14  | 1                 | 1                           | 0                | 10.0        | 22.1                     | 40.0        | 87.9                    |                     |
|                                                                            | 15  | 1                 | 2                           | 0                | 10.0        | 44.2                     | 40.0        | 65.8                    |                     |
|                                                                            | 16  | 2                 | 1                           | 0                | 20.0        | 22.1                     | 40.0        | 87.9                    |                     |
|                                                                            | 17  | 2                 | 2                           | 0                | 20.0        | 44.2                     | 40.0        | 65.8                    |                     |
|                                                                            | 18  | 2                 | 4                           | 0                | 20.0        | 88.5                     | 40.0        | 21.5                    |                     |
|                                                                            | 19  | 1                 | 0.5                         | 0                | 10.0        | 11.1                     | 60.0        | 78.9                    |                     |
|                                                                            | 20  | 1                 | 1                           | 0                | 10.0        | 22.1                     | 60.0        | 67.9                    |                     |
|                                                                            | 21  | 1                 | 2                           | 0                | 10.0        | 44.2                     | 60.0        | 45.8                    |                     |
|                                                                            | 22  | 2                 | 1                           | 0                | 20.0        | 22.1                     | 60.0        | 67.9                    |                     |
|                                                                            | 23  | 2                 | 2                           | 0                | 20.0        | 44.2                     | 60.0        | 45.8                    |                     |

|    |   |   |                    |      |      |       |                               |                      |
|----|---|---|--------------------|------|------|-------|-------------------------------|----------------------|
| 24 | 2 | 4 | 0                  | 20.0 | 88.5 | 60.0  | 1.5                           | 24h/24h\12h<br>150°C |
| 25 | 2 | 2 | 0                  | 20.0 | 44.2 | 10.0  | 95.8                          |                      |
| 26 | 2 | 2 | 0                  | 20.0 | 44.2 | 20.0  | 85.8                          |                      |
| 27 | 2 | 2 | 0                  | 20.0 | 44.2 | 50.0  | 55.8                          |                      |
| 28 | 2 | 2 | 0                  | 20.0 | 44.2 | 60.0  | 45.8                          |                      |
| 29 | 2 | 2 | 0                  | 20.0 | 44.2 | 85.0  | 20.8                          |                      |
| 30 | 2 | 2 | 0                  | 20.0 | 44.2 | 100.0 | 5.8                           |                      |
| 31 | 2 | 2 | 0                  | 20.0 | 44.2 | 10.0  | 95.8                          | 4h/16h\8h<br>150°C   |
| 32 | 2 | 2 | 0                  | 20.0 | 44.2 | 20.0  | 85.8                          |                      |
| 33 | 2 | 2 | 0                  | 20.0 | 44.2 | 50.0  | 55.8                          |                      |
| 34 | 2 | 2 | 0                  | 20.0 | 44.2 | 60.0  | 45.8                          |                      |
| 35 | 2 | 2 | 0                  | 20.0 | 44.2 | 85.0  | 20.8                          |                      |
| 36 | 2 | 2 | 0                  | 20.0 | 44.2 | 100.0 | 5.8                           |                      |
| 37 | 2 | 2 | 0                  | 20.0 | 44.2 | 10.0  | 95.8                          | 12h/36h\12h 130°C    |
| 38 | 2 | 2 | 0                  | 20.0 | 44.2 | 60.0  | 45.8                          |                      |
| 39 | 2 | 2 | 0                  | 20.0 | 44.2 | 100.0 | 5.8                           |                      |
| 40 | 2 | 1 | 0                  | 20.0 | 22.1 | 20.0  | 107.9                         |                      |
| 41 | 2 | 2 | 0                  | 20.0 | 44.2 | 20.0  | 85.8                          |                      |
| 42 | 2 | 4 | 0                  | 20.0 | 88.5 | 20.0  | 41.5                          |                      |
| 43 | 2 | 2 | 0                  | 20.0 | 44.2 | 30.0  | 225.8                         |                      |
| 44 | 2 | 2 | 0                  | 20.0 | 44.2 | 150.0 | 105.8                         |                      |
| 45 | 2 | 2 | 0                  | 20.0 | 44.2 | 250.0 | 5.8                           |                      |
| 46 | 2 | 1 | 0                  | 20.0 | 22.1 | 50.0  | 227.9                         |                      |
| 47 | 2 | 2 | 0                  | 20.0 | 44.2 | 50.0  | 205.8                         |                      |
| 48 | 2 | 4 | 0                  | 20.0 | 88.5 | 50.0  | 161.5                         |                      |
|    |   |   |                    |      |      |       | V<br>DMF<br>[μL]              |                      |
| 49 | 2 | 2 | 0                  | 20.0 | 44.2 | 10.0  | 95.8                          |                      |
| 50 | 2 | 2 | 0                  | 20.0 | 44.2 | 60.0  | 45.8                          |                      |
| 51 | 2 | 2 | 0                  | 20.0 | 44.2 | 100.0 | 5.8                           |                      |
| 52 | 2 | 1 | 0                  | 20.0 | 22.1 | 20.0  | 107.9                         |                      |
| 53 | 2 | 2 | 0                  | 20.0 | 44.2 | 20.0  | 85.8                          |                      |
| 54 | 2 | 4 | 0                  | 20.0 | 88.5 | 20.0  | 41.5                          |                      |
| 55 | 2 | 2 | 0                  | 20.0 | 44.2 | 30.0  | 225.8                         |                      |
| 56 | 2 | 2 | 0                  | 20.0 | 44.2 | 150.0 | 105.8                         |                      |
| 57 | 2 | 2 | 0                  | 20.0 | 44.2 | 250.0 | 5.8                           |                      |
| 58 | 2 | 1 | 0                  | 20.0 | 22.1 | 50.0  | 227.9                         |                      |
| 59 | 2 | 2 | 0                  | 20.0 | 44.2 | 50.0  | 205.8                         |                      |
| 60 | 2 | 4 | 0                  | 20.0 | 88.5 | 50.0  | 161.5                         |                      |
|    |   |   | 2M<br>NaOH<br>[μL] |      |      |       | V<br>H <sub>2</sub> O<br>[μL] |                      |
| 61 | 2 | 2 | 0.0                | 21.4 | 20.0 | 60.0  | 35.8                          | 1h/16h\1h 150°C      |
| 62 | 2 | 2 | 0.0                | 21.4 | 20.0 | 60.0  | 25.8                          |                      |
| 63 | 2 | 2 | 0.0                | 21.4 | 20.0 | 60.0  | 15.8                          |                      |
| 64 | 2 | 2 | 10.0               | 21.4 | 20.0 | 60.0  | 35.8                          |                      |

|    |   |   |                                |      |      |                               |                   |                 |
|----|---|---|--------------------------------|------|------|-------------------------------|-------------------|-----------------|
| 65 | 2 | 2 | 20.0                           | 21.4 | 20.0 | 60.0                          | 25.8              | 1h/6h\1h 180°C  |
| 66 | 2 | 2 | 30.0                           | 21.4 | 20.0 | 60.0                          | 15.8              |                 |
| 67 | 2 | 2 | 0.0                            | 21.4 | 20.0 | 60.0                          | 35.8              |                 |
| 68 | 2 | 2 | 0.0                            | 21.4 | 20.0 | 60.0                          | 25.8              |                 |
| 69 | 2 | 2 | 0.0                            | 21.4 | 20.0 | 60.0                          | 15.8              |                 |
| 70 | 2 | 2 | 10.0                           | 21.4 | 20.0 | 60.0                          | 35.8              |                 |
| 71 | 2 | 2 | 20.0                           | 21.4 | 20.0 | 60.0                          | 25.8              |                 |
| 72 | 2 | 2 | 30.0                           | 21.4 | 20.0 | 60.0                          | 15.8              |                 |
|    |   |   | 1M<br>HNO <sub>3</sub><br>[μL] |      |      | V<br>DMF<br>[μL]              | V<br>EtOH<br>[μL] | 1h/16h\1h 150°C |
| 73 | 2 | 2 | 10.0                           | 21.4 | 20.0 | 60.0                          | 35.8              |                 |
| 74 | 2 | 2 | 20.0                           | 21.4 | 20.0 | 60.0                          | 25.8              |                 |
| 75 | 2 | 2 | 30.0                           | 21.4 | 20.0 | 60.0                          | 15.8              |                 |
|    |   |   |                                |      |      | V<br>H <sub>2</sub> O<br>[μL] | V<br>EtOH<br>[μL] |                 |
| 76 | 2 | 2 | 10.0                           | 21.4 | 20.0 | 60.0                          | 35.8              |                 |
| 77 | 2 | 2 | 20.0                           | 21.4 | 20.0 | 60.0                          | 25.8              |                 |
| 78 | 2 | 2 | 30.0                           | 21.4 | 20.0 | 60.0                          | 15.8              |                 |

**Table S4.** Molar ratios and exact amounts of the reactants employed in the HT experiments for MIL-53(Ga)-NH<sub>2</sub>/NO<sub>2</sub>.

| metal source                                                                | No. | equivalent linker | equivalent In <sup>3+</sup> | additive [μL/mg] | linker [mg] | In <sup>3+</sup> [μL/mg] | V EtOH [μL] | V H <sub>2</sub> O [μL] | temperature program |
|-----------------------------------------------------------------------------|-----|-------------------|-----------------------------|------------------|-------------|--------------------------|-------------|-------------------------|---------------------|
| 2M In(NO <sub>3</sub> ) <sub>3</sub> · H <sub>2</sub> O in H <sub>2</sub> O | 1   | 1                 | 0.5                         | 0                | 10.0        | 11.1                     | 10.0        | 128.9                   | 1h/36h\1h 150°C     |
|                                                                             | 2   | 1                 | 1                           | 0                | 10.0        | 22.1                     | 10.0        | 117.9                   |                     |
|                                                                             | 3   | 1                 | 2                           | 0                | 10.0        | 44.2                     | 10.0        | 95.8                    |                     |
|                                                                             | 4   | 2                 | 1                           | 0                | 20.0        | 22.1                     | 10.0        | 117.9                   |                     |
|                                                                             | 5   | 2                 | 2                           | 0                | 20.0        | 44.2                     | 10.0        | 95.8                    |                     |
|                                                                             | 6   | 2                 | 4                           | 0                | 20.0        | 88.5                     | 10.0        | 51.5                    |                     |
|                                                                             | 7   | 1                 | 0.5                         | 0                | 10.0        | 11.1                     | 20.0        | 118.9                   |                     |
|                                                                             | 8   | 1                 | 1                           | 0                | 10.0        | 22.1                     | 20.0        | 107.9                   |                     |
|                                                                             | 9   | 1                 | 2                           | 0                | 10.0        | 44.2                     | 20.0        | 85.8                    |                     |
|                                                                             | 10  | 2                 | 1                           | 0                | 20.0        | 22.1                     | 20.0        | 107.9                   |                     |
|                                                                             | 11  | 2                 | 2                           | 0                | 20.0        | 44.2                     | 20.0        | 85.8                    |                     |
|                                                                             | 12  | 2                 | 4                           | 0                | 20.0        | 88.5                     | 20.0        | 41.5                    |                     |
|                                                                             | 13  | 1                 | 0.5                         | 0                | 10.0        | 11.1                     | 40.0        | 98.9                    | 8h/16h\4h 150°C     |
|                                                                             | 14  | 1                 | 1                           | 0                | 10.0        | 22.1                     | 40.0        | 87.9                    |                     |
|                                                                             | 15  | 1                 | 2                           | 0                | 10.0        | 44.2                     | 40.0        | 65.8                    |                     |
|                                                                             | 16  | 2                 | 1                           | 0                | 20.0        | 22.1                     | 40.0        | 87.9                    |                     |
|                                                                             | 17  | 2                 | 2                           | 0                | 20.0        | 44.2                     | 40.0        | 65.8                    |                     |
|                                                                             | 18  | 2                 | 4                           | 0                | 20.0        | 88.5                     | 40.0        | 21.5                    |                     |
|                                                                             | 19  | 1                 | 0.5                         | 0                | 10.0        | 11.1                     | 60.0        | 78.9                    |                     |
|                                                                             | 20  | 1                 | 1                           | 0                | 10.0        | 22.1                     | 60.0        | 67.9                    |                     |

|    |   |   |                    |      |      |                               |                  |                      |
|----|---|---|--------------------|------|------|-------------------------------|------------------|----------------------|
| 21 | 1 | 2 | 0                  | 10.0 | 44.2 | 60.0                          | 45.8             |                      |
| 22 | 2 | 1 | 0                  | 20.0 | 22.1 | 60.0                          | 67.9             |                      |
| 23 | 2 | 2 | 0                  | 20.0 | 44.2 | 60.0                          | 45.8             |                      |
| 24 | 2 | 4 | 0                  | 20.0 | 88.5 | 60.0                          | 1.5              |                      |
| 25 | 2 | 2 | 0                  | 20.0 | 44.2 | 10.0                          | 95.8             | 24h/24h\12h<br>150°C |
| 26 | 2 | 2 | 0                  | 20.0 | 44.2 | 20.0                          | 85.8             |                      |
| 27 | 2 | 2 | 0                  | 20.0 | 44.2 | 50.0                          | 55.8             |                      |
| 28 | 2 | 2 | 0                  | 20.0 | 44.2 | 60.0                          | 45.8             |                      |
| 29 | 2 | 2 | 0                  | 20.0 | 44.2 | 85.0                          | 20.8             |                      |
| 30 | 2 | 2 | 0                  | 20.0 | 44.2 | 100.0                         | 5.8              |                      |
| 31 | 2 | 2 | 0                  | 20.0 | 44.2 | 10.0                          | 95.8             |                      |
| 32 | 2 | 2 | 0                  | 20.0 | 44.2 | 20.0                          | 85.8             |                      |
| 33 | 2 | 2 | 0                  | 20.0 | 44.2 | 50.0                          | 55.8             |                      |
| 34 | 2 | 2 | 0                  | 20.0 | 44.2 | 60.0                          | 45.8             |                      |
| 35 | 2 | 2 | 0                  | 20.0 | 44.2 | 85.0                          | 20.8             |                      |
| 36 | 2 | 2 | 0                  | 20.0 | 44.2 | 100.0                         | 5.8              |                      |
| 37 | 2 | 2 | 0                  | 20.0 | 44.2 | 10.0                          | 95.8             |                      |
| 38 | 2 | 2 | 0                  | 20.0 | 44.2 | 60.0                          | 45.8             | 12h/36h\12h 130°C    |
| 39 | 2 | 2 | 0                  | 20.0 | 44.2 | 100.0                         | 5.8              |                      |
| 40 | 2 | 1 | 0                  | 20.0 | 22.1 | 20.0                          | 107.9            |                      |
| 41 | 2 | 2 | 0                  | 20.0 | 44.2 | 20.0                          | 85.8             |                      |
| 42 | 2 | 4 | 0                  | 20.0 | 88.5 | 20.0                          | 41.5             |                      |
| 43 | 2 | 2 | 0                  | 20.0 | 44.2 | 30.0                          | 225.8            |                      |
| 44 | 2 | 2 | 0                  | 20.0 | 44.2 | 150.0                         | 105.8            |                      |
| 45 | 2 | 2 | 0                  | 20.0 | 44.2 | 250.0                         | 5.8              |                      |
| 46 | 2 | 1 | 0                  | 20.0 | 22.1 | 50.0                          | 227.9            |                      |
| 47 | 2 | 2 | 0                  | 20.0 | 44.2 | 50.0                          | 205.8            |                      |
| 48 | 2 | 4 | 0                  | 20.0 | 88.5 | 50.0                          | 161.5            |                      |
|    |   |   |                    |      |      |                               | V<br>DMF<br>[μL] |                      |
| 49 | 2 | 2 | 0                  | 20.0 | 44.2 | 10.0                          | 95.8             |                      |
| 50 | 2 | 2 | 0                  | 20.0 | 44.2 | 60.0                          | 45.8             |                      |
| 51 | 2 | 2 | 0                  | 20.0 | 44.2 | 100.0                         | 5.8              |                      |
| 52 | 2 | 1 | 0                  | 20.0 | 22.1 | 20.0                          | 107.9            |                      |
| 53 | 2 | 2 | 0                  | 20.0 | 44.2 | 20.0                          | 85.8             |                      |
| 54 | 2 | 4 | 0                  | 20.0 | 88.5 | 20.0                          | 41.5             |                      |
| 55 | 2 | 2 | 0                  | 20.0 | 44.2 | 30.0                          | 225.8            |                      |
| 56 | 2 | 2 | 0                  | 20.0 | 44.2 | 150.0                         | 105.8            |                      |
| 57 | 2 | 2 | 0                  | 20.0 | 44.2 | 250.0                         | 5.8              |                      |
| 58 | 2 | 1 | 0                  | 20.0 | 22.1 | 50.0                          | 227.9            |                      |
| 59 | 2 | 2 | 0                  | 20.0 | 44.2 | 50.0                          | 205.8            |                      |
| 60 | 2 | 4 | 0                  | 20.0 | 88.5 | 50.0                          | 161.5            |                      |
|    |   |   | 2M<br>NaOH<br>[μL] |      |      | V<br>H <sub>2</sub> O<br>[μL] |                  |                      |
| 61 | 2 | 2 | 0.0                | 21.4 | 20.0 | 60.0                          | 35.8             | 1h/16h\1<br>h 150°C  |

|                                                                |    |   |     |                                |      |      |                               |                   |                   |
|----------------------------------------------------------------|----|---|-----|--------------------------------|------|------|-------------------------------|-------------------|-------------------|
|                                                                | 62 | 2 | 2   | 0.0                            | 21.4 | 20.0 | 60.0                          | 25.8              |                   |
|                                                                | 63 | 2 | 2   | 0.0                            | 21.4 | 20.0 | 60.0                          | 15.8              |                   |
|                                                                | 64 | 2 | 2   | 10.0                           | 21.4 | 20.0 | 60.0                          | 35.8              |                   |
|                                                                | 65 | 2 | 2   | 20.0                           | 21.4 | 20.0 | 60.0                          | 25.8              |                   |
|                                                                | 66 | 2 | 2   | 30.0                           | 21.4 | 20.0 | 60.0                          | 15.8              |                   |
|                                                                | 67 | 2 | 2   | 0.0                            | 21.4 | 20.0 | 60.0                          | 35.8              | 1h/6h\1h 180°C    |
|                                                                | 68 | 2 | 2   | 0.0                            | 21.4 | 20.0 | 60.0                          | 25.8              |                   |
|                                                                | 69 | 2 | 2   | 0.0                            | 21.4 | 20.0 | 60.0                          | 15.8              |                   |
|                                                                | 70 | 2 | 2   | 10.0                           | 21.4 | 20.0 | 60.0                          | 35.8              |                   |
|                                                                | 71 | 2 | 2   | 20.0                           | 21.4 | 20.0 | 60.0                          | 25.8              |                   |
|                                                                | 72 | 2 | 2   | 30.0                           | 21.4 | 20.0 | 60.0                          | 15.8              |                   |
|                                                                |    |   |     | 1M<br>HNO <sub>3</sub><br>[μL] |      |      | V<br>DMF<br>[μL]              | V<br>EtOH<br>[μL] | 1h/16h\1h 150°C   |
|                                                                | 73 | 2 | 2   | 10.0                           | 21.4 | 20.0 | 60.0                          | 35.8              |                   |
|                                                                | 74 | 2 | 2   | 20.0                           | 21.4 | 20.0 | 60.0                          | 25.8              |                   |
|                                                                | 75 | 2 | 2   | 30.0                           | 21.4 | 20.0 | 60.0                          | 15.8              |                   |
|                                                                |    |   |     |                                |      |      | V<br>H <sub>2</sub> O<br>[μL] | V<br>EtOH<br>[μL] |                   |
|                                                                | 76 | 2 | 2   | 10.0                           | 21.4 | 20.0 | 60.0                          | 35.8              |                   |
|                                                                | 77 | 2 | 2   | 20.0                           | 21.4 | 20.0 | 60.0                          | 25.8              |                   |
|                                                                | 78 | 2 | 2   | 30.0                           | 21.4 | 20.0 | 60.0                          | 15.8              |                   |
| 2M In(NO <sub>3</sub> ) <sub>3</sub> · H <sub>2</sub> O in DMF |    |   |     |                                |      |      | V<br>EtOH<br>[μL]             | V<br>DMF<br>[μL]  | 12h/36h\12h 130°C |
|                                                                |    | 2 | 2   | 0                              | 20.0 | 44.2 | 10.0                          | 95.8              |                   |
|                                                                |    | 2 | 2   | 0                              | 20.0 | 44.2 | 60.0                          | 45.8              |                   |
|                                                                |    | 2 | 2   | 0                              | 20.0 | 44.2 | 100.0                         | 5.8               |                   |
|                                                                |    | 2 | 1   | 0                              | 20.0 | 22.1 | 20.0                          | 107.9             |                   |
|                                                                |    | 2 | 2   | 0                              | 20.0 | 44.2 | 20.0                          | 85.8              |                   |
|                                                                |    | 2 | 4   | 0                              | 20.0 | 88.5 | 20.0                          | 41.5              |                   |
|                                                                |    | 2 | 2   | 0                              | 20.0 | 44.2 | 30.0                          | 225.8             |                   |
|                                                                |    | 2 | 2   | 0                              | 20.0 | 44.2 | 150.0                         | 105.8             |                   |
|                                                                |    | 2 | 2   | 0                              | 20.0 | 44.2 | 250.0                         | 5.8               |                   |
|                                                                |    | 2 | 1   | 0                              | 20.0 | 22.1 | 50.0                          | 227.9             |                   |
|                                                                |    | 2 | 2   | 0                              | 20.0 | 44.2 | 50.0                          | 205.8             |                   |
|                                                                |    | 2 | 4   | 0                              | 20.0 | 88.5 | 50.0                          | 161.5             |                   |
|                                                                |    | 1 | 0.5 | 0                              | 10.0 | 11.1 | 10.0                          | 128.9             |                   |
|                                                                |    | 1 | 1   | 0                              | 10.0 | 22.1 | 10.0                          | 117.9             |                   |
|                                                                |    | 1 | 2   | 0                              | 10.0 | 44.2 | 10.0                          | 95.8              |                   |
|                                                                |    | 2 | 1   | 0                              | 20.0 | 22.1 | 10.0                          | 117.9             |                   |
|                                                                |    | 2 | 2   | 0                              | 20.0 | 44.2 | 10.0                          | 95.8              |                   |
|                                                                |    | 2 | 4   | 0                              | 20.0 | 88.5 | 10.0                          | 51.5              |                   |
|                                                                |    | 1 | 0.5 | 0                              | 10.0 | 11.1 | 20.0                          | 118.9             |                   |
|                                                                | 1  | 1 | 0   | 10.0                           | 22.1 | 20.0 | 107.9                         |                   |                   |
|                                                                | 1  | 2 | 0   | 10.0                           | 44.2 | 20.0 | 85.8                          |                   |                   |
|                                                                |    |   |     |                                |      |      |                               |                   | 1h/6h\1h 150°C    |



|  |   |     |   |      |      |      |       |
|--|---|-----|---|------|------|------|-------|
|  | 2 | 1   | 0 | 20.0 | 22.1 | 20.0 | 107.9 |
|  | 2 | 2   | 0 | 20.0 | 44.2 | 20.0 | 85.8  |
|  | 2 | 4   | 0 | 20.0 | 88.5 | 20.0 | 41.5  |
|  | 1 | 0.5 | 0 | 10.0 | 11.1 | 40.0 | 98.9  |
|  | 1 | 1   | 0 | 10.0 | 22.1 | 40.0 | 87.9  |
|  | 1 | 2   | 0 | 10.0 | 44.2 | 40.0 | 65.8  |
|  | 2 | 1   | 0 | 20.0 | 22.1 | 40.0 | 87.9  |
|  | 2 | 2   | 0 | 20.0 | 44.2 | 40.0 | 65.8  |
|  | 2 | 4   | 0 | 20.0 | 88.5 | 40.0 | 21.5  |
|  | 1 | 0.5 | 0 | 10.0 | 11.1 | 60.0 | 78.9  |
|  | 1 | 1   | 0 | 10.0 | 22.1 | 60.0 | 67.9  |
|  | 1 | 2   | 0 | 10.0 | 44.2 | 60.0 | 45.8  |
|  | 2 | 1   | 0 | 20.0 | 22.1 | 60.0 | 67.9  |
|  | 2 | 2   | 0 | 20.0 | 44.2 | 60.0 | 45.8  |
|  | 2 | 4   | 0 | 20.0 | 88.5 | 60.0 | 1.5   |

## XRD patterns and refinements

MIL-53(Al)-NH<sub>2</sub>/NO<sub>2</sub> (1) synthesized in DMF

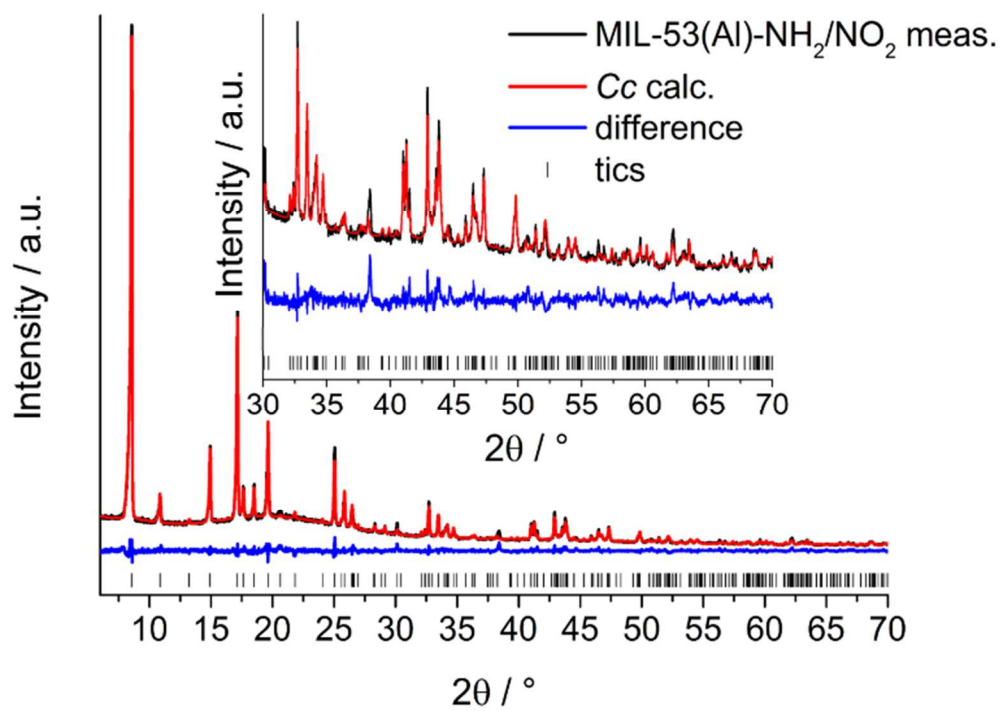

**Figure S6.** Final Rietveld plot of MIL-53(Al)-NH<sub>2</sub>/NO<sub>2</sub> synthesized in DMF (1).

MIL-53(Al)-NH<sub>2</sub>/NO<sub>2</sub> (2) synthesized in EtOH

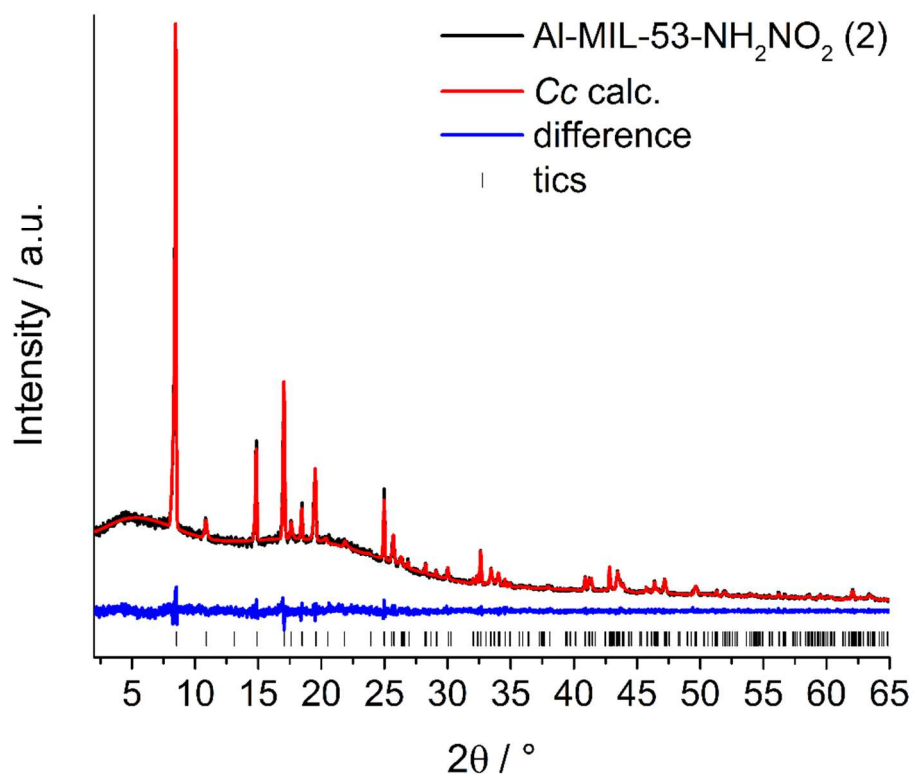

Figure S7. Pawley refinement of MIL-53(Al)-NH<sub>2</sub>/NO<sub>2</sub> (2) synthesized in EtOH (2).

MIL-53(Ga)-NH<sub>2</sub>/NO<sub>2</sub> (3)

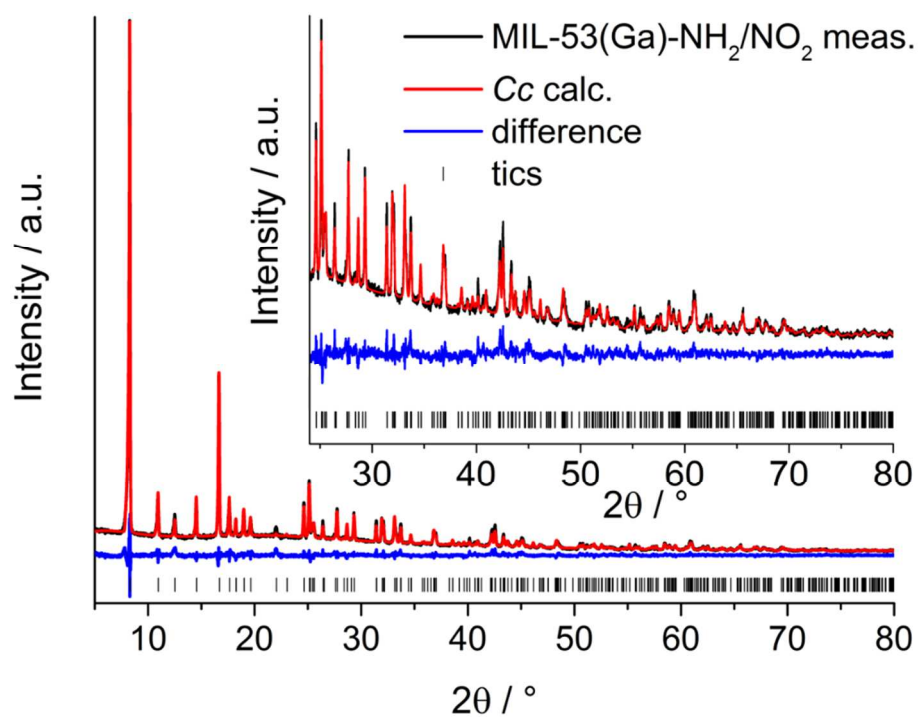

Figure S8. Final Rietveld plot of MIL-53(Ga)-NH<sub>2</sub>/NO<sub>2</sub>(3).

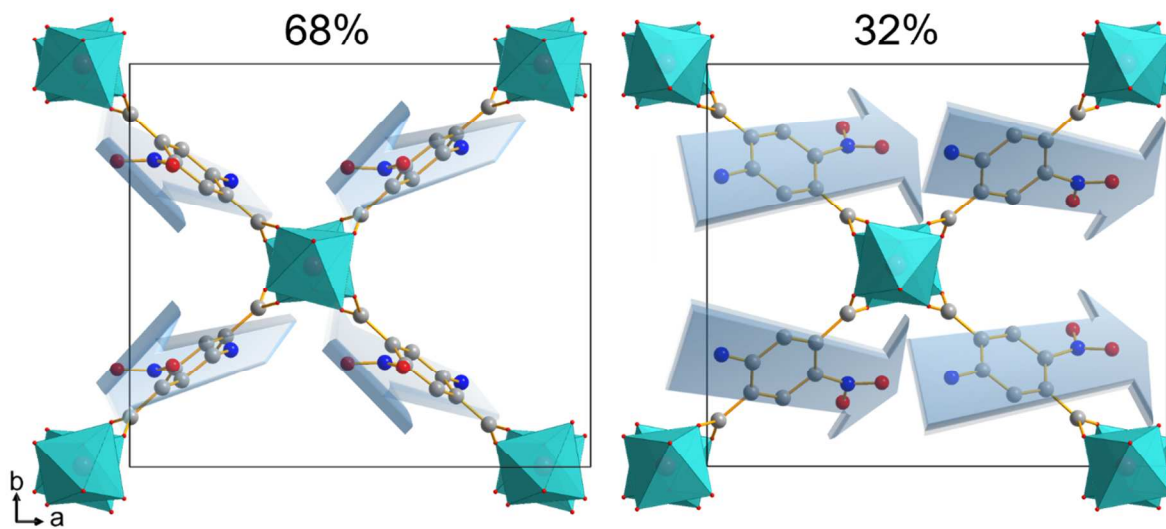

Figure S9. Crystal structure of MIL-53(Ga) along [001]. The disordering (above) of the structure contains 68% of the NO<sub>2</sub> groups of the linker molecules showing out of the plane and 39% pointing in plane. Carbon atoms are shown in grey, oxygen in red, nitrogen in blue and GaO<sub>6</sub> polyhedra in turquoise.

MIL-53(In)-NH<sub>2</sub>/NO<sub>2</sub> (4)

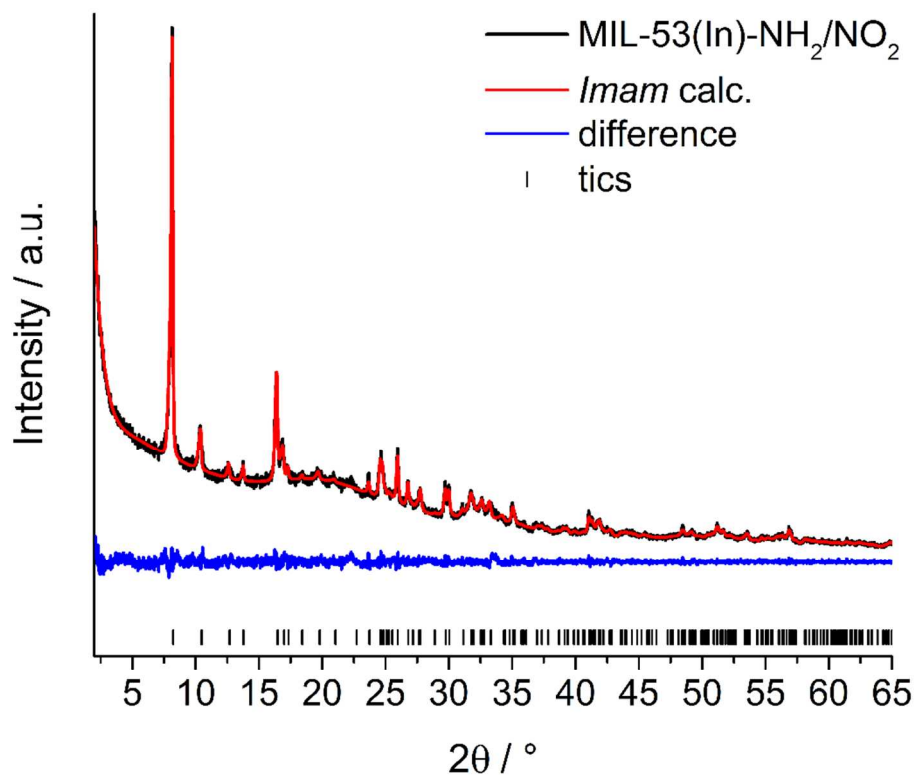

**Figure S10.** Plot of the Pawley refinement of MIL-53(In)-NH<sub>2</sub>/NO<sub>2</sub> (4).

MIL-53(Al)-NH<sub>2</sub>/NO<sub>2</sub>\_vnp (5), the XRD pattern of the as synthesized material is shown in the manuscript

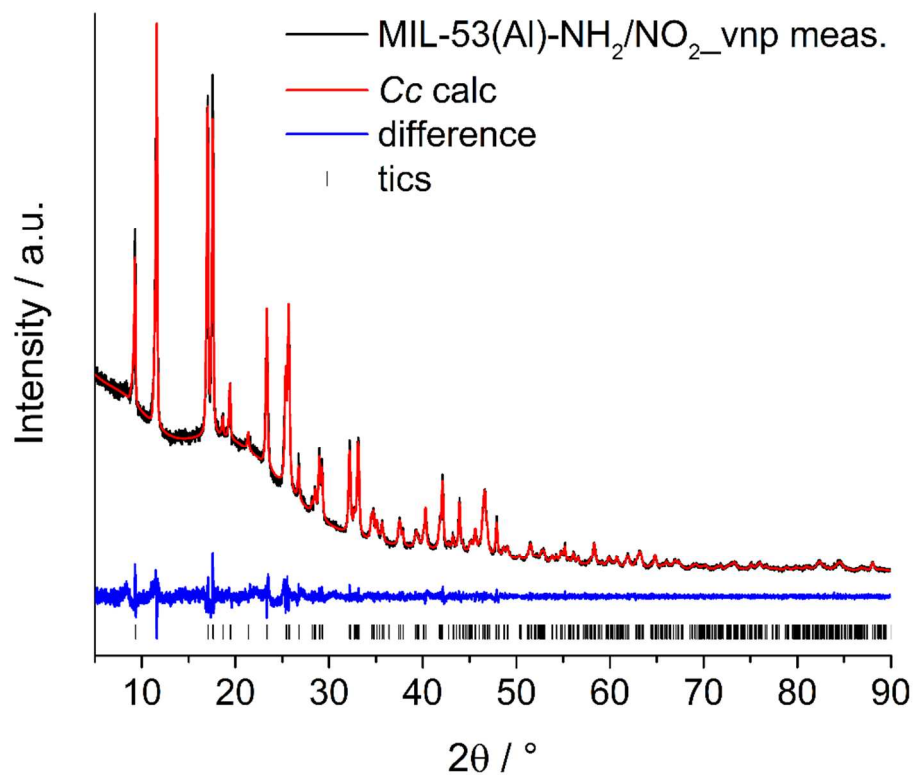

Figure S11. Pawley refinement of MIL-53(Al)-NH<sub>2</sub>/NO<sub>2</sub>\_vnp (5).

Table S5. Results of the Pawley refinement of MIL-53(Al)-NH<sub>2</sub>/NO<sub>2</sub>\_vnp.

| MIL-53(Al)-NH <sub>2</sub> /NO <sub>2</sub> _vnp |            |
|--------------------------------------------------|------------|
| <i>a</i> / Å                                     | 20.125(1)  |
| <i>b</i> / Å                                     | 8.2940(6)  |
| <i>c</i> / Å                                     | 6.6506(4)  |
| $\beta$ / °                                      | 109.531(5) |
| space group                                      | <i>Cc</i>  |
| <i>R</i> <sub>wp</sub> / %                       | 3.04       |
| GoF                                              | 1.86       |

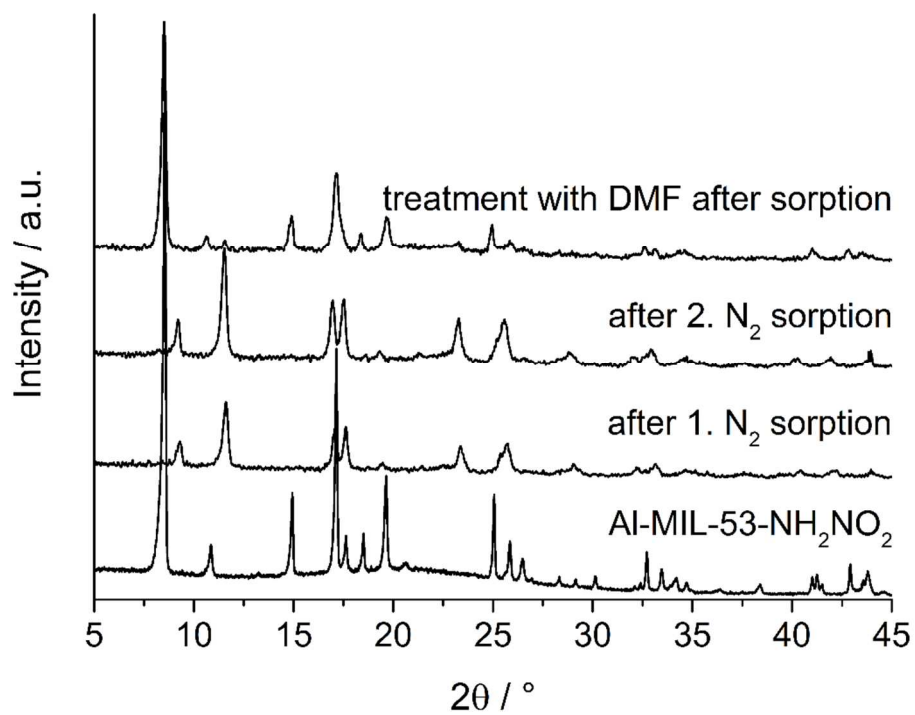

**Figure S12.** The vnp form of MIL-53(AI)-NH<sub>2</sub>/NO<sub>2</sub> (**5**) obtained after N<sub>2</sub> sorption experiments (PXRDs shown in the middle) can be transformed to the as synthesized form (**1**, bottom) by immersion with DMF (top).

## TG curves and elementary analysis

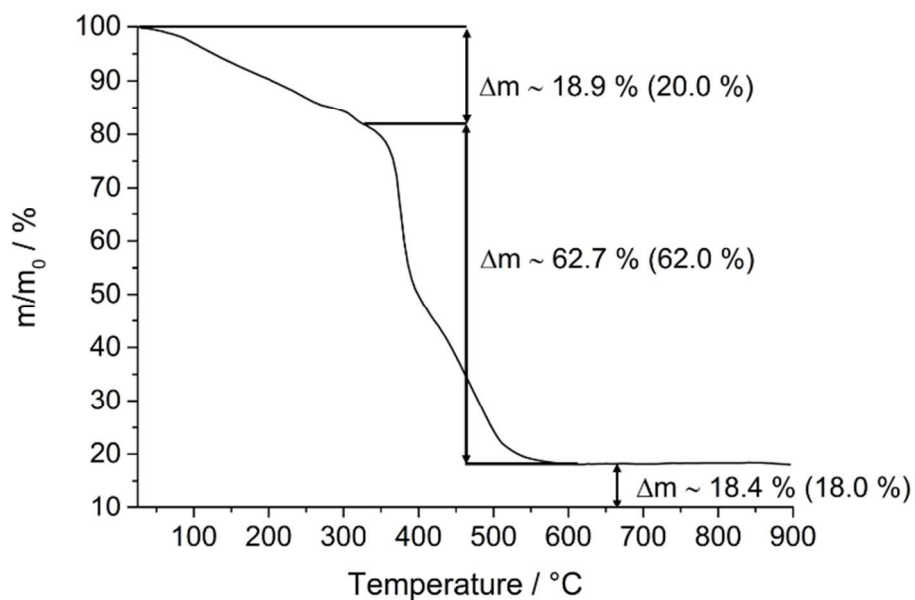

**Figure S13.** Thermogravimetric measurement for MIL-53(Al)-NH<sub>2</sub>/NO<sub>2</sub> synthesized in DMF (1). Calculated values for the assumed sum formula are given in brackets.

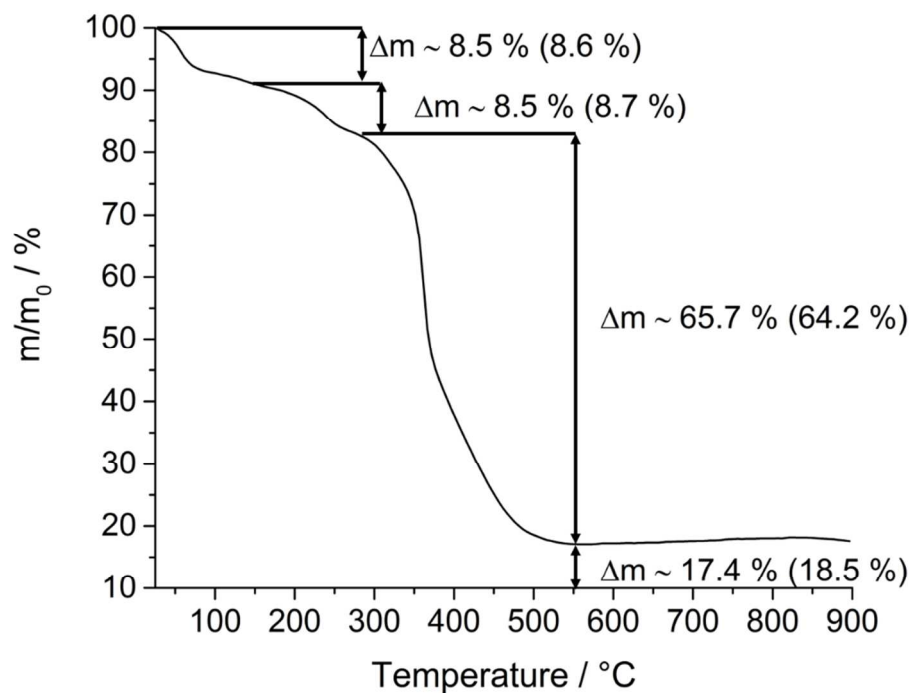

**Figure S14.** Thermogravimetric measurement for MIL-53(Al)-NH<sub>2</sub>/NO<sub>2</sub> synthesized in EtOH (2). Calculated values for the assumed sum formula are given in brackets.



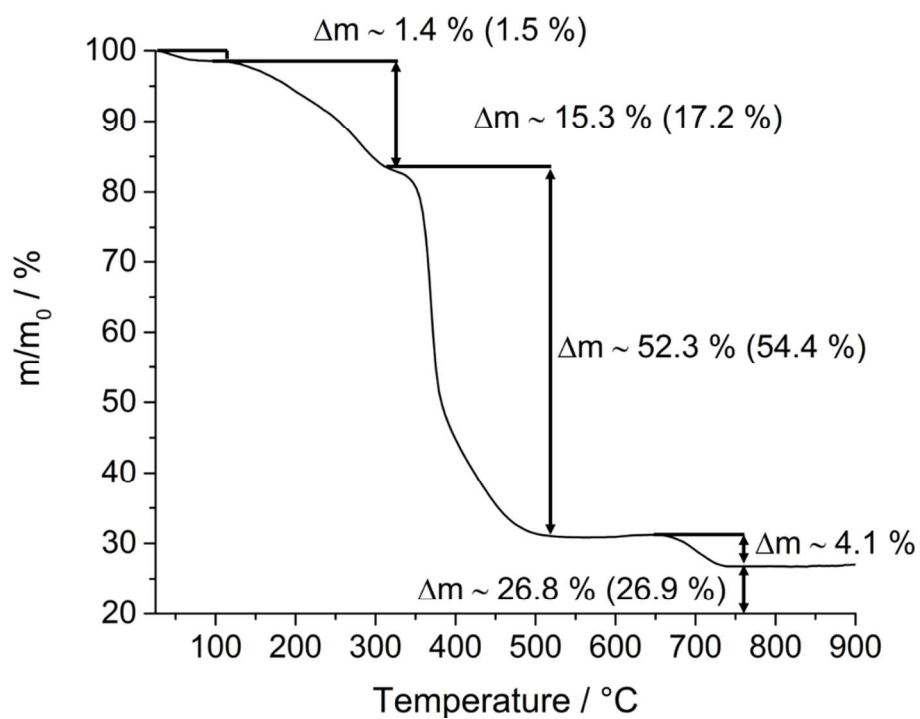

**Figure S15.** Thermogravimetric measurement for MIL-53(Ga)-NH<sub>2</sub>/NO<sub>2</sub> (**3**). Calculated values for the assumed sum formula are given in brackets. The step at 700 °C is originating from the decomposition of Ga species like Ga(NO<sub>3</sub>)O, Ga(OH)<sub>3</sub> and Ga(OH)O to Ga<sub>2</sub>O<sub>3</sub>.<sup>[1]</sup>

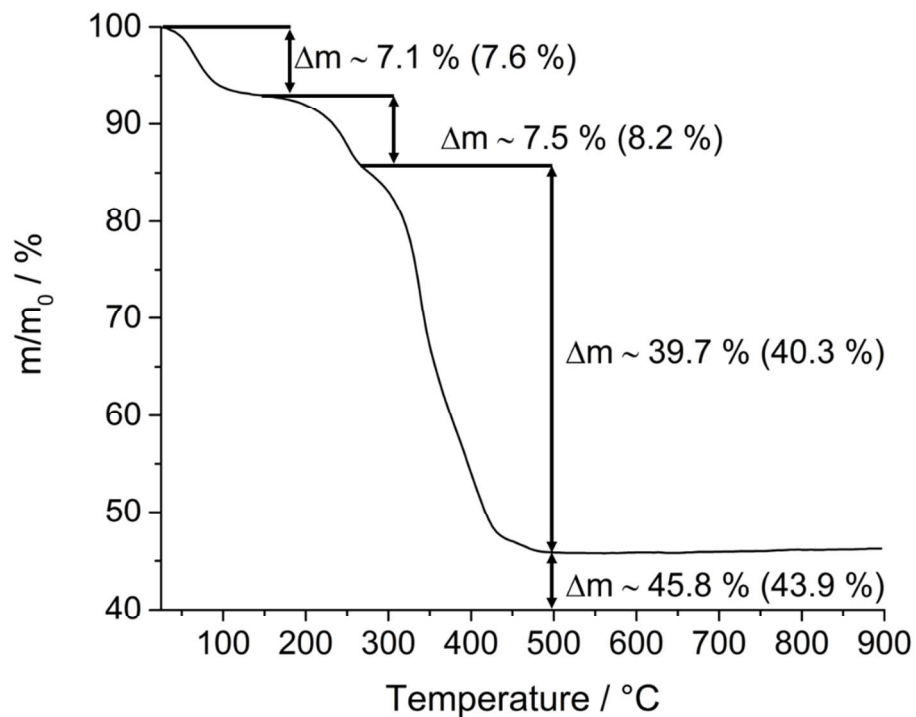

**Figure S16.** Thermogravimetric measurement for MIL-53(In)-NH<sub>2</sub>/NO<sub>2</sub> (**4**). Calculated values for the assumed sum formula are given in brackets.

**Table S6.** Elementary analysis for the MIL-53 compounds. Sum formulas were obtained from thermogravimetric measurements.

| compound                                                                                           |       | C / % | H / % | N / % |
|----------------------------------------------------------------------------------------------------|-------|-------|-------|-------|
| MIL-53(Al)-NH <sub>2</sub> NO <sub>2</sub>                                                         | calc. | 38.5  | 3.4   | 12.2  |
| [Al(OH)(BDC-NH <sub>2</sub> NO <sub>2</sub> )]·0.92DMF                                             | meas. | 38.0  | 3.2   | 11.8  |
| MIL-53(Al)-NH <sub>2</sub> NO <sub>2</sub> (2)                                                     | calc. | 34.1  | 3.6   | 8.6   |
| [Al(OH)(BDC-NH <sub>2</sub> NO <sub>2</sub> )]·0.61EtOH·1.57H <sub>2</sub> O                       | meas. | 37.1  | 2.8   | 9.2   |
| MIL-53(Ga)-NH <sub>2</sub> NO <sub>2</sub>                                                         | calc. | 34.4  | 3.2   | 10.6  |
| [Ga(OH)(BDC-NH <sub>2</sub> NO <sub>2</sub> )]·0.13EtOH·1.9DMF                                     | meas. | 33.3  | 2.9   | 10.1  |
| MIL-53(In)-NH <sub>2</sub> NO <sub>2</sub>                                                         | calc. | 26.7  | 2.4   | 7.0   |
| [In(OH)(BDC-NH <sub>2</sub> NO <sub>2</sub> )]·0.86EtOH·0.58DMF·0.43In <sub>2</sub> O <sub>3</sub> | meas. | 23.4  | 2.0   | 5.9   |

## SEM images

MIL-53(Al)-NH<sub>2</sub>/NO<sub>2</sub> (1) synthesis in DMF

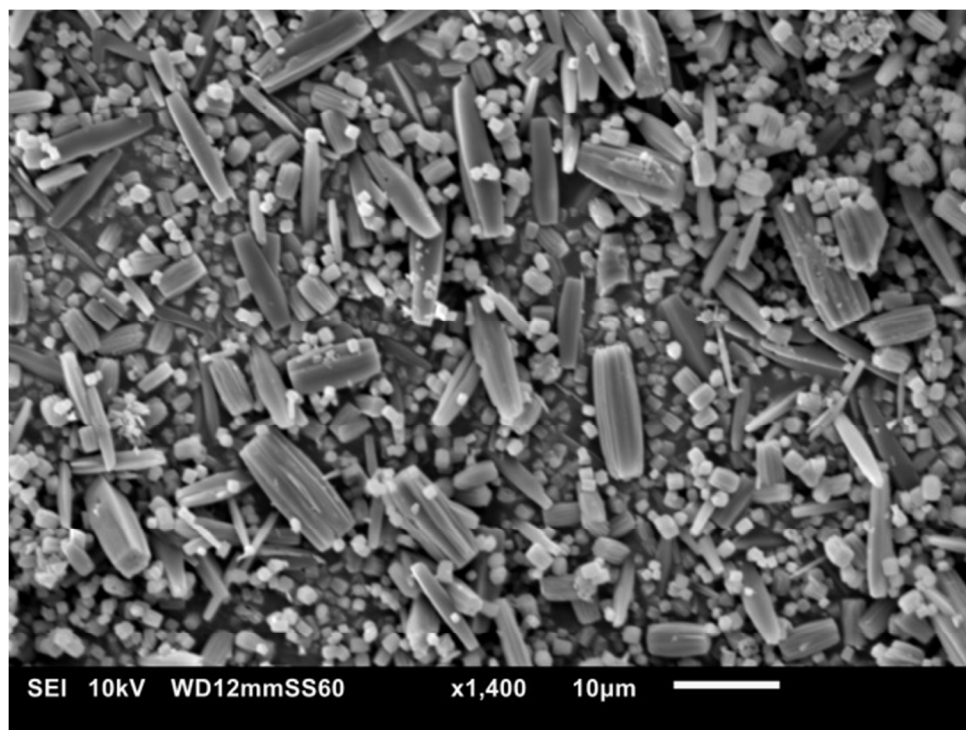

**Figure S17.** For MIL-53(Al)-NH<sub>2</sub>/NO<sub>2</sub> (1) elongated more or less rectangular crystals with a size around 10 μm were obtained, along with small cubic crystals between 0.5-2 μm in size.

**MIL-53(Al)-NH<sub>2</sub>/NO<sub>2</sub> (2) synthesis in ethanol**

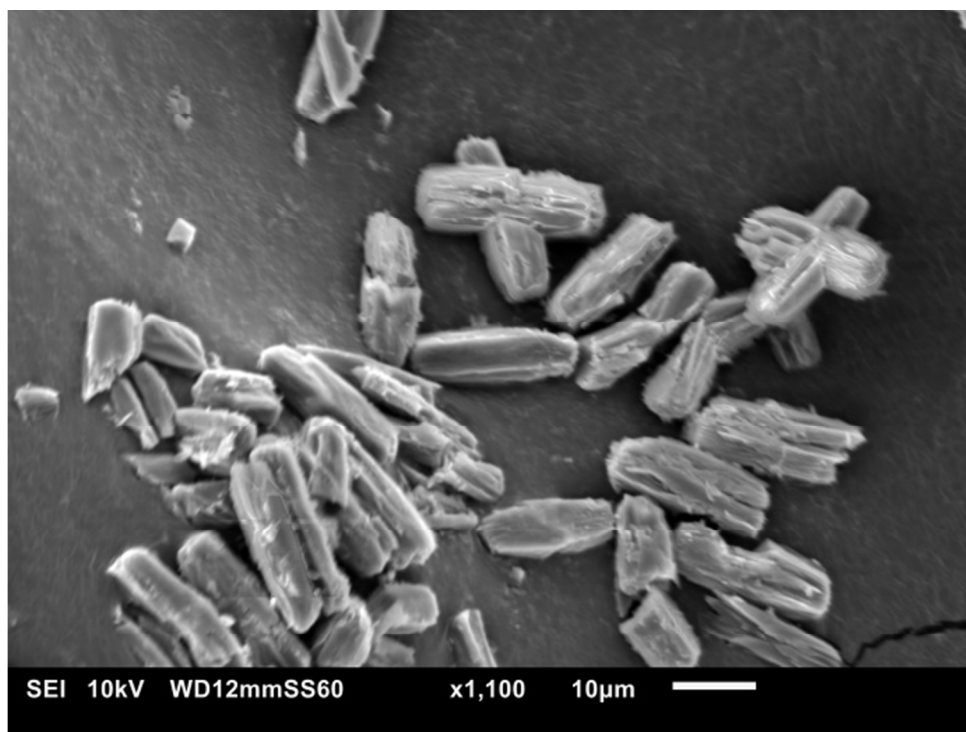

**Figure S18.** For MIL-53(Al)-NH<sub>2</sub>/NO<sub>2</sub> (2) synthesized in ethanol, thicker crystals than for synthesis in DMF were obtained.

MIL-53(Ga)-NH<sub>2</sub>/NO<sub>2</sub> (3)

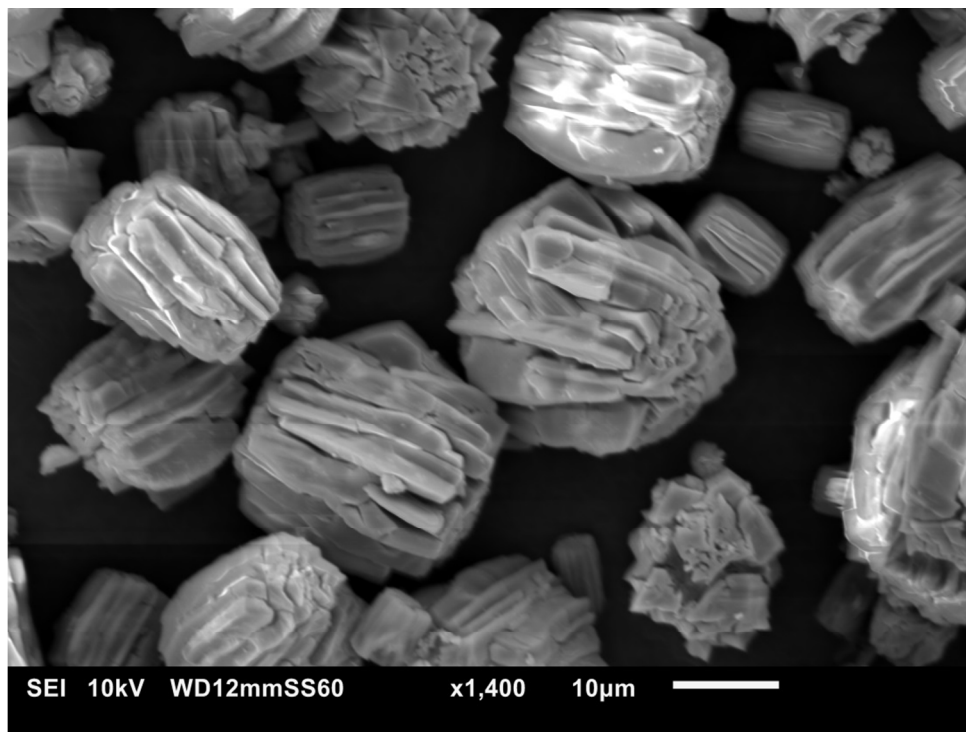

**Figure S19.** For MIL-53(Ga)-NH<sub>2</sub>/NO<sub>2</sub> (3) aggregated crystals were obtained that seem to consist out of elongated rectangular crystals grown alongside each other.

**MIL-53(In)-NH<sub>2</sub>/NO<sub>2</sub> (4)**

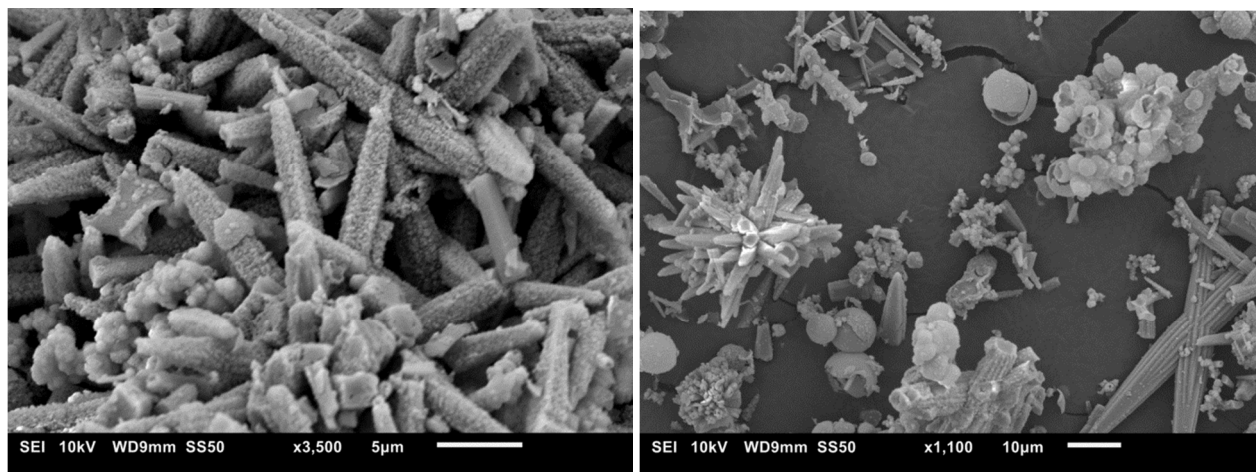

**Figure S20.** For MIL-53(In)-NH<sub>2</sub>/NO<sub>2</sub> (4) only limited crystallinity was achieved, with crystals being very polycrystalline and aggregated.

## NMR spectra

During the synthesis of MIL-53(Al)-NH<sub>2</sub>/NO<sub>2</sub> (**2**) in ethanol, 15% of the amino groups were ethylated. **Figure S21** shows the numbering scheme of the linker molecule for the discussion in the NMR spectra. The allocation of the signals was confirmed by 2D NMR spectroscopy.

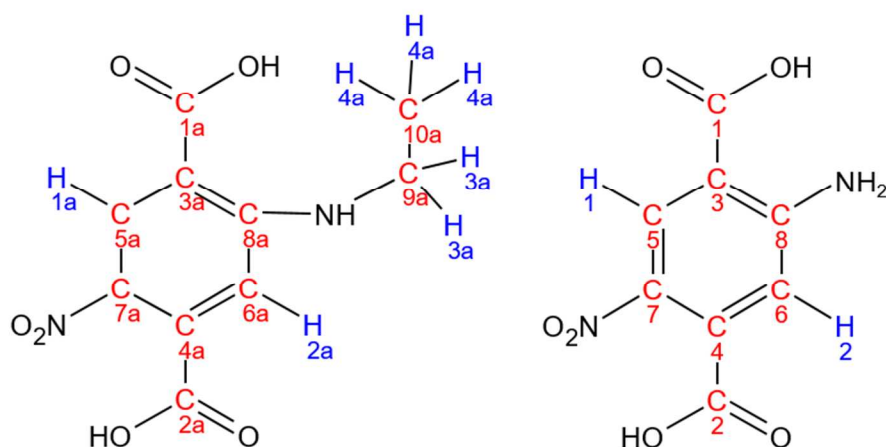

**Figure S21.** Numbering scheme of H<sub>2</sub>BDC-NH<sub>2</sub>/NO<sub>2</sub> (right) and the ethylated linker molecule (left) as it is used in the NMR spectra displayed.

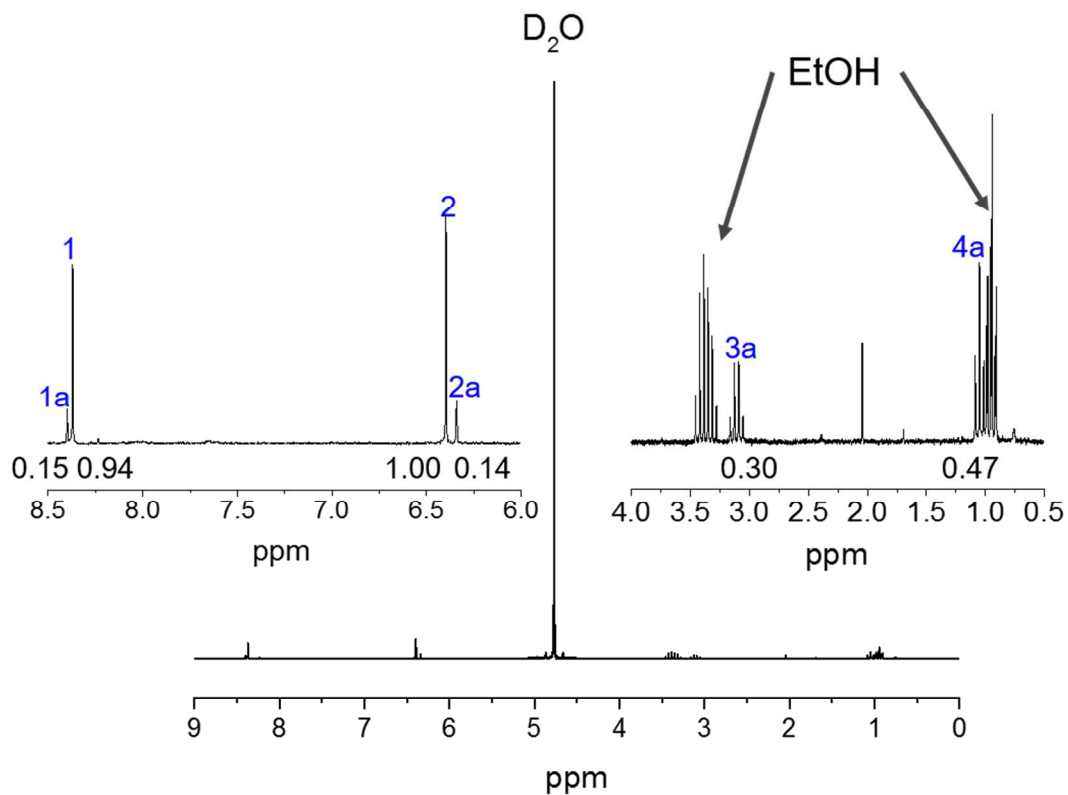

**Figure S22.**  $^1\text{H-NMR}$  spectrum of MIL-53(Al)-NH<sub>2</sub>/NO<sub>2</sub> (2) dissolved in 5% NaOD in D<sub>2</sub>O. The integrals are displayed beneath the corresponding signals.

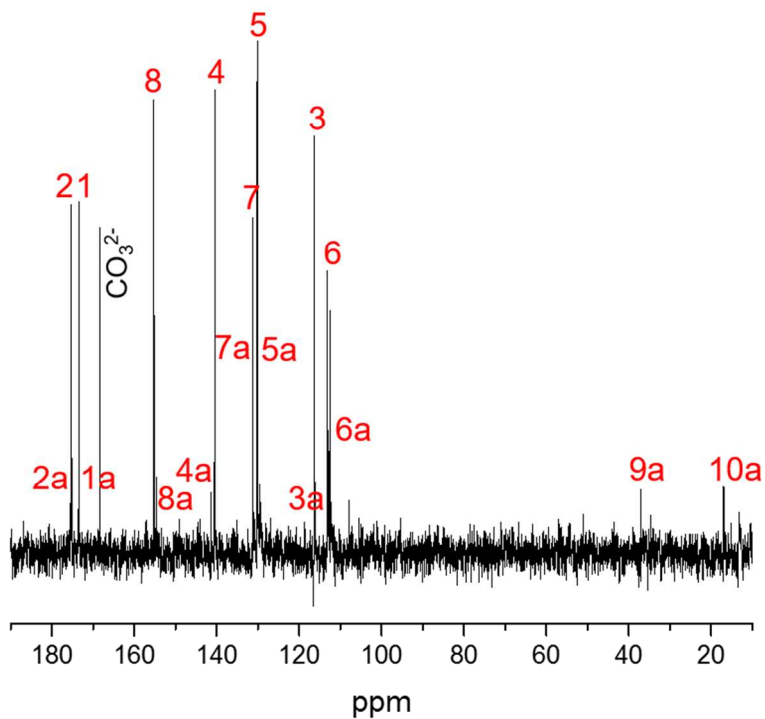

**Figure S23.**  $^{13}\text{C-NMR}$  spectrum of MIL-53(Al)-NH<sub>2</sub>/NO<sub>2</sub> (2) dissolved in 5% NaOD in D<sub>2</sub>O. The carbonate peak is due to the solution of CO<sub>2</sub> in the solvent used.



## Sorption experiments

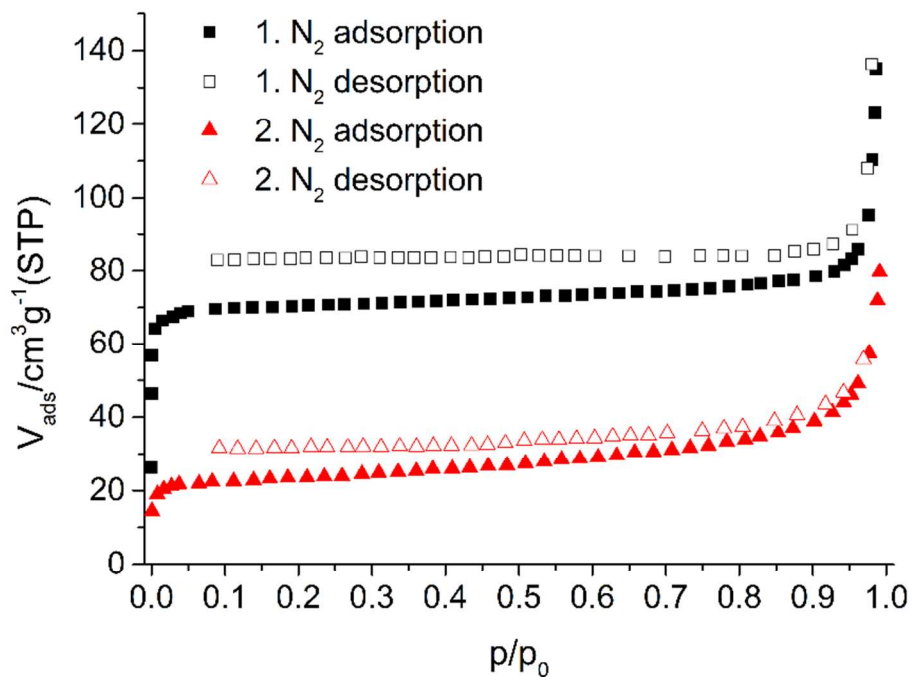

Figure S24. N<sub>2</sub> sorption isotherms of MIL-53(Al)-NH<sub>2</sub>/NO<sub>2</sub> synthesized in DMF (1).

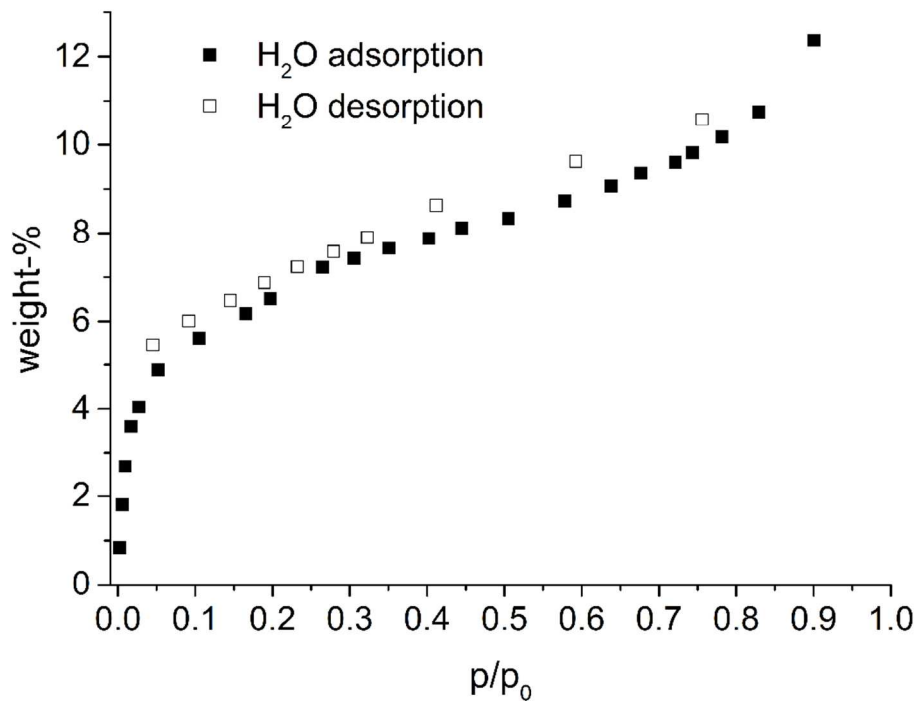

Figure S25. H<sub>2</sub>O sorption isotherms of MIL-53(Al)-NH<sub>2</sub>/NO<sub>2</sub> (1).

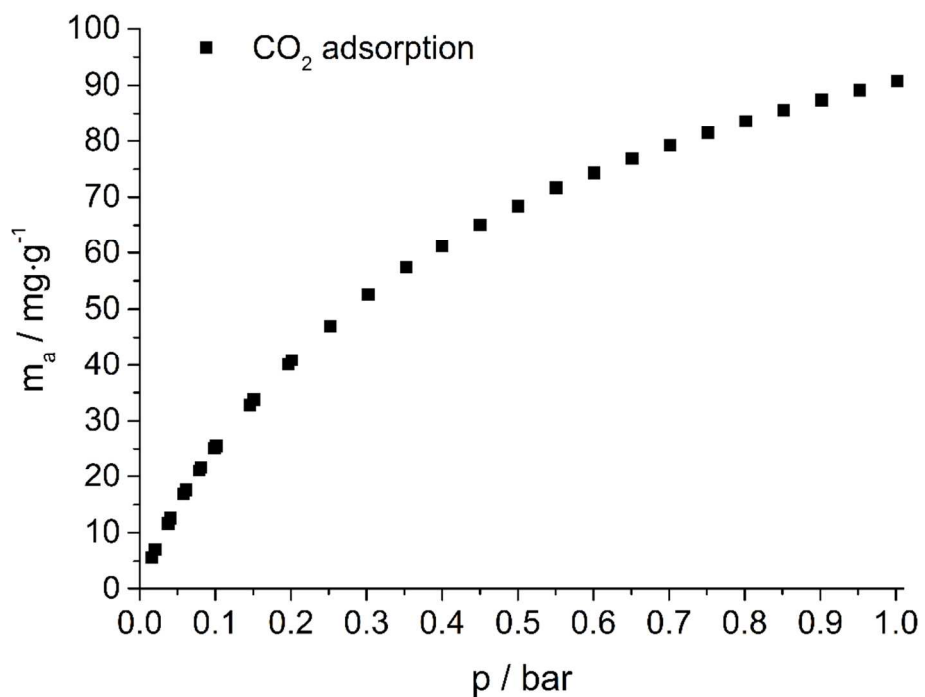

**Figure S26.** CO<sub>2</sub> sorption isotherm of MIL-53(Al)-NH<sub>2</sub>/NO<sub>2</sub> (1).

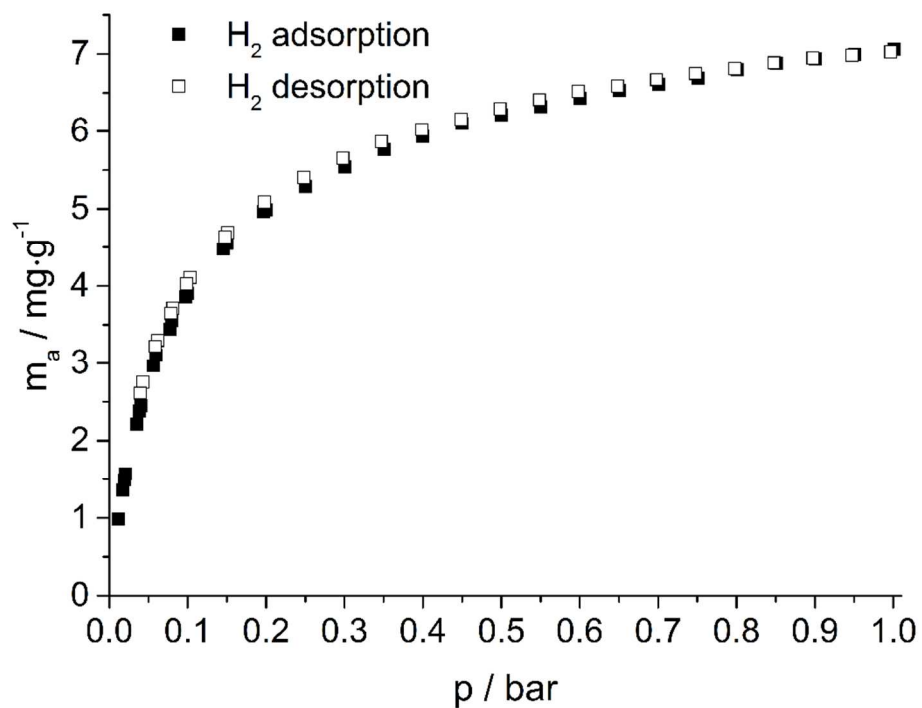

**Figure S27.** H<sub>2</sub> sorption isotherms of MIL-53(Al)-NH<sub>2</sub>/NO<sub>2</sub> (1).

## SHG microscopy

### MIL-53(AI)-NH<sub>2</sub>/NO<sub>2</sub> (1) as synthesized in DMF

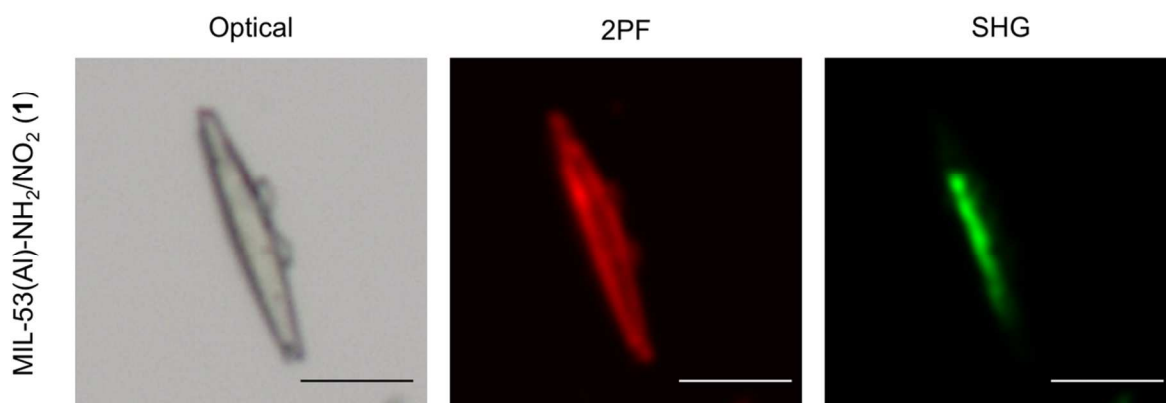

**Figure S28.** From left to right: optical, two-photon fluorescence and second harmonic generation images of MIL-53(AI)-NH<sub>2</sub>/NO<sub>2</sub> (1). The SHG image displays the average intensity calculated over 60 images, each image being 3° apart in polarization direction of the incident polarized laser beam. The scale bars indicate a distance of 10 μm for each image.

### MIL-53(AI)-NH<sub>2</sub>/NO<sub>2</sub> (2) as synthesized in ethanol

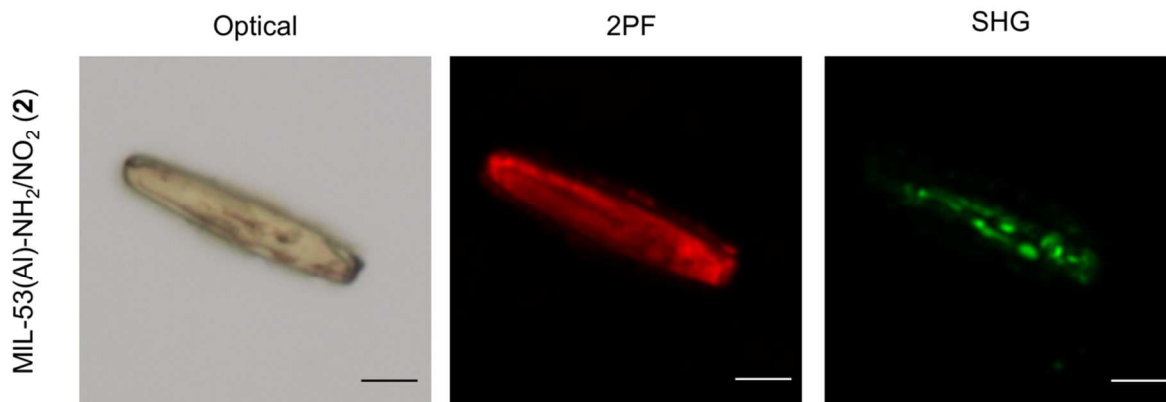

**Figure S29.** From left to right: optical, two-photon fluorescence and second harmonic generation images of MIL-53(AI)-NH<sub>2</sub>/NO<sub>2</sub> (2). The SHG image displays the average intensity calculated over 60 images, each image being 3° apart in polarization direction of the incident polarized laser beam. The scale bars indicate a distance of 10 μm for each image.

**MIL-53(In)-NH<sub>2</sub>/NO<sub>2</sub> (4) as synthesized in DMF**

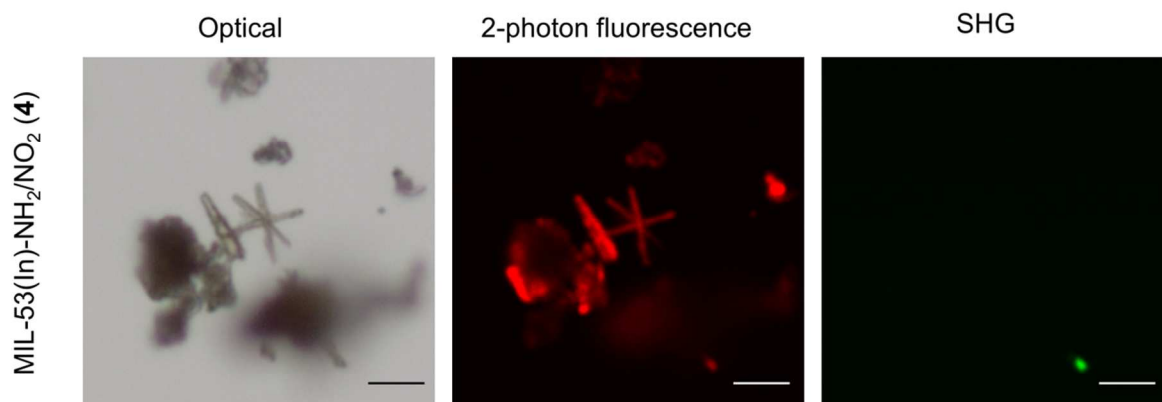

**Figure S30.** From left to right: optical, two-photon fluorescence and second harmonic generation images of MIL-53(In)-NH<sub>2</sub>/NO<sub>2</sub> (4). The SHG image displays the average intensity calculated over 60 images, each image being 3° apart in polarization direction of the incident polarized laser beam. The scale bars indicate a distance of 10 μm for each image.

## Calculation of $\langle d_{\text{eff}} \rangle$ values

To obtain the value for  $d_{\text{eff}}$ , the procedure as previously used by van der Veen *et al.* was followed.<sup>2,3</sup> Firstly, the SHG intensity of the sample was measured ( $I_{2\omega,x}$ ) in an SHG wide field microscopy setup; next the SHG intensity of a reference sample was measured ( $I_{2\omega,BBO}$ ). Beta barium borate (BBO) was used as a reference, 100  $\mu\text{m}$  thick, cut to achieve type I phase matching and to optimize the quadratic nonlinear response ( $\theta = 29.2^\circ$ ,  $\varphi = 90^\circ$ ; Eksma optics, BBO-601H). The formula for the second-order nonlinear coefficient  $\langle d_{\text{eff}} \rangle$  was derived as follows:

$$I_{2\omega,x} = A \frac{\langle d_{\text{eff}} \rangle^2 r^2 I_{\omega,x}^2}{n_{2\omega,x} n_{\omega,x}^2}$$

$$I_{2\omega,BBO} = A \frac{d_{\text{ooe}}^2 L^2 I_{\omega,BBO}^2}{n_{\theta,2\omega,BBO} n_{\omega,BBO}^2}$$

$$\Rightarrow \langle d_{\text{eff}} \rangle = \sqrt{\frac{I_{2\omega,x}}{I_{2\omega,BBO}} \cdot d_{\text{ooe}}^2 \cdot \frac{L^2}{r^2} \cdot \frac{I_{\omega,BBO}^2}{I_{\omega,x}^2} \cdot \frac{n_{2\omega,x} n_{\omega,x}^2}{n_{\theta,2\omega,BBO} n_{\omega,BBO}^2}}$$

With:

$A$  = all the variables that are identical for both the sample and the BBO crystal

$I_{2\omega,x}$  = the SHG intensity of the sample

$I_{2\omega,BBO}$  = intensity of the SHG light of the BBO reference, measured with a plane of polarization of linearly polarized laser light for which the SHG intensity reaches a maximum

$I_{\omega}$  = the intensity of the incident laser light, linearly polarized

$r$  = the height of the crystallites

$n_{2\omega}$  = the refractive index at the frequency of the second-harmonic light

$n_{\omega}$  = the refractive index at the frequency of the incident laser light

The values of the refractive indices of metal-organic frameworks vary between 1.2 and 1.65 in the VIS to NIR spectral region.<sup>4-6</sup> We used a value of 1.5 for both  $n_{2\omega}$  and  $n_{\omega}$ , as this was the value determined for the related material MIL-53(Al)-NH<sub>2</sub>.<sup>2</sup>

$d_{\text{ooe}} = 2.01 \text{ pm/V}$  = effective nonlinearity coefficient for type I phase-matched interaction for BBO

$L$  = the thickness of the BBO crystal, 100  $\mu\text{m}$

$n_{\theta,2\omega,BBO}$  = extraordinary refractive index at the frequency of the SHG light, propagating at an angle  $\theta$  with the optical axis of the crystal

$n_{\omega,BBO}^2$  = ordinary refractive index of BBO at the frequency of the incident light  $\omega$

Linearly polarized laser light was used to irradiate the sample and all the SHG signal was collected (no analyzer was positioned between the sample and the detector). To calculate the  $d_{\text{eff}}$  value for one crystal, the average over nine different orientations of linearly polarized laser light (all  $10^\circ$  apart) was calculated. To obtain the final  $\langle d_{\text{eff}} \rangle$  value, the results were averaged over approximately 20 different crystals.

## Ab initio calculations

Additional details about the multi-scale approach to calculate the macroscopic electric properties ( $\chi^{(1)}$  and  $\chi^{(2)}$  tensors). This method combines first principles calculations of the molecular properties with a classical electrostatic interactions scheme, known as the local field theory (LFT), to account for the crystal environment effects.<sup>7-11</sup> In LFT methodology, the  $\chi^{(1)}$  and  $\chi^{(2)}$  tensors read:

$$\underline{\underline{\chi}}^{(1)}(-\omega; \omega) = \frac{1}{\varepsilon_0 V} \sum_k \underline{\underline{d}}_k^T(\omega) \cdot \underline{\underline{\alpha}}_k(-\omega; \omega)$$

$$\underline{\underline{\chi}}^{(2)}(-2\omega; \omega, \omega) = \frac{1}{2\varepsilon_0 V} \sum_k \underline{\underline{d}}_k^T(2\omega) \cdot \underline{\underline{\beta}}_k(-2\omega; \omega, \omega) : \underline{\underline{d}}_k^T(\omega) \underline{\underline{d}}_k^T(\omega)$$

where the k-sum runs over all (sub)molecules of the unit cell,  $\alpha_k$  and  $\beta_k$  are the k-th (sub)molecule (hyper)polarizability tensors obtained by distributing evenly the ions (hyper)polarizabilities on the heavy atoms with the hydrogen atoms attached to them,  $\varepsilon_0$  is the dielectric permittivity of vacuum, V is the unit cell volume and

$$\underline{\underline{d}}_k(\omega) = \sum_k \underline{\underline{D}}_{kk'}(\omega)$$

$$\underline{\underline{D}}^{-1}(\omega) = \left[ \underline{\underline{1}} - \frac{1}{V\varepsilon_0} \underline{\underline{L}} \cdot \underline{\underline{\alpha}}(-\omega; \omega) \right]$$

where  $\underline{\underline{L}}$  is the Lorentz factor tensor,  $\underline{\underline{\alpha}}$  is the supermatrix of (sub)molecular polarizabilities. Therefore,  $\underline{\underline{d}}_k$  interrelates the local electric field  $\underline{\underline{E}}_k$  (on the k-th (sub)molecule) with the macroscopic electric field  $\underline{\underline{E}}$ :

$$\underline{\underline{E}}_k = \underline{\underline{d}}_k \cdot \underline{\underline{E}}$$

The  $\chi^{(1)}$  tensor components were calculated in the abc\* orthogonal reference frame and the  $\chi^{(2)}$  tensor components are reported in the eigenbasis of the calculated dielectric tensor  $\underline{\underline{\varepsilon}}(\omega) = \underline{\underline{1}} + \underline{\underline{\chi}}^{(1)}(\omega)$  whose eigenvectors are the squares of the refractive indices. The final  $\chi^{(1)}$  and  $\chi^{(2)}$  tensors of the investigated material (combining A and C phases) were obtained as weighted averages, first in the abc\* frame, then the resulting  $\chi^{(2)}$  was transformed to the optical indicatrix axes of the averaged  $\underline{\underline{\varepsilon}}(\omega) = \underline{\underline{1}} + \underline{\underline{\chi}}^{(1)}(\omega)$  tensor (using the weights from the powder diffraction refinement).

The calculations of molecular properties,  $\alpha$  and  $\beta$ , were performed for the individual cations (+2 charge) and anions (-2 charge) within their embedding electric field. Beforehand, starting from the X-ray diffraction data the geometry of the different crystals were optimized using periodic boundary conditions, the B3LYP exchange-correlation potential and the 6-31G(d,p) basis set. Only the fractional coordinates were optimized with the cell parameters kept fixed at their experimental values. The Crystal14 package<sup>12</sup> was employed. This in-crystal electric field was simulated by a 100 Å radius sphere of Mulliken point charges, calculated using the PBC/B3LYP/6-31G(d,p) method on the optimized crystal. The adequacy of this choice of charge definition has recently been discussed.<sup>13</sup> First, the static ( $\lambda = \infty$ ) responses were evaluated at the second-order Møller-Plesset method (MP2) level. The dynamic MP2 (Møller-Plesset second-order perturbation theory) molecular properties were evaluated by employing a modified multiplicative scheme,<sup>14</sup> where the static MP2 values are combined with the static coupled-perturbed Kohn-Sham (CPKS) and dynamic time-dependent DFT (TDDFT) tensors evaluated using the B3LYP XC functional, following the scheme described in Ref. 15. At both levels, the selected basis set is the 6-

311++G(d,p) basis and it contains both diffuse and polarization functions for an accurate prediction of the linear and nonlinear molecular properties. All the molecular property calculations were performed with Gaussian09.<sup>16</sup> Performing calculations at the experimental incident wavelength of 800 nm was not possible since the  $\lambda/2$  wavelength (400 nm) is already in the resonant regime of the anions, which leads to qualitatively wrong hyperpolarizability values. Additional TDDFT/B3LYP/6-311++G(d,p) calculations of the excitation energies of the anions in the crystal field confirmed that the first excitation energies correspond to a wavelength of 393 nm, 422 nm, and 325 nm for compounds **1**, **3**, and **4**, respectively, in close agreement with experiment. Nevertheless, the computational results at an incident wavelength of 1064 nm (SHG at 532 nm) are expected to be sufficiently close for analyzing the experimental results. Frequency/wavelength dependence of the macroscopic responses is further described in Tables S7-S8.

Using the  $\chi^{(1)}$  and  $\chi^{(2)}$  tensor components the  $d_{eff}$  values were calculated for types I and type II phase matchings (PM) conditions. The (non-polarized or polarized one when not aligned on the natural o or e polarization vectors, which is the general case) light beam traveling through anisotropic medium (biaxial crystal in our case) splits into two perpendicularly polarized beams [(+) and (-)] traveling at different speeds inversely proportional to the refractive indices associated to those polarizations: with  $n_+ > n_-$  ( $v_+ < v_-$ , where  $v$  is the phase velocity). The second-order process involves interaction between three beams: two at fundamental frequency ( $\omega$ ) and one at the double frequency ( $2\omega$ ). The effectiveness of the SHG interaction is governed by the extent of the (+) and (-) index surfaces overlap for the two frequencies. Two possibilities are usually considered: i) interaction of the fundamental rays having (+) polarization with the SHG beam at (-) polarization (type I PM) and ii) fundamental rays having opposite polarizations (+ and -) with SHG at (-) polarization (type II PM). Then, having defined the polarization directions of the light waves using the polar angles ( $\theta, \phi$ ) (with  $0 \leq \theta \leq \pi$  and  $0 \leq \phi \leq 2\pi$ ) the  $d_{eff}$  values are evaluated using:

$$d_{eff} = \frac{1}{2} \underline{e}_i(2\omega) \cdot \underline{\chi}^{(2)}: \underline{e}_j(\omega) \underline{e}_k(\omega) \times \text{sinc}\left(\frac{\Delta k r}{2}\right)$$

where  $\underline{e}_i$ ,  $\underline{e}_j$  and  $\underline{e}_k$  are the light waves polarization vectors,  $r$  is the optical path length (symbolizing the grain size in the calculation) and

$$\Delta k = \frac{2\pi}{\lambda} \Delta n; \Delta n = 2n_{2\omega}^1 - n_{\omega}^2 - n_{\omega}^3$$

is the phase mismatch related to the difference of refractive indices. 1, 2, and 3 refer to the crystal axes. Finally, all possible orientations of the light wave polarization with respect to the crystal grains, defined by the polar angles ( $\theta, \phi$ ), are taken into account to provide the average  $\langle d_{eff} \rangle$  quantities.

**Table S7.** MP2/LFT results for MIL-53(Al)-NH<sub>2</sub>/NO<sub>2</sub> and MIL-53(Al)-NH<sub>2</sub> (in the very narrow pore phase): refractive indices, selected  $\chi^{(2)}$  tensor components (pm/V), and  $\langle d_{eff} \rangle$  (pm/V) for different grain sizes at different wavelengths (nm). For MIL-53(Al)-NH<sub>2</sub>/NO<sub>2</sub>, results are listed for the pure A and C phases as well as for the A/C mixture (A:C = 61:39 as obtained from XRD analysis).

| Compound and phase                                         | $\lambda$ | $n_1$ | $n_2$ | $n_3$ | $\chi_{333}^{(2)}$ | $\chi_{111}^{(2)}$ | $\chi_{133}^{(2)}$ | $\langle d_{eff} \rangle$<br>r = 0 $\mu\text{m}$ | $\langle d_{eff} \rangle$<br>r = 3 $\mu\text{m}$ | $\langle d_{eff} \rangle$<br>r = 10 $\mu\text{m}$ |
|------------------------------------------------------------|-----------|-------|-------|-------|--------------------|--------------------|--------------------|--------------------------------------------------|--------------------------------------------------|---------------------------------------------------|
| MIL-53(Al)-NH <sub>2</sub> /NO <sub>2</sub><br>Phase A     | $\infty$  | 1.539 | 1.416 | 1.721 | 51.2               | -1.1               | -7.7               | 1.950                                            | 0.208                                            | 0.061                                             |
|                                                            | 1064      | 1.553 | 1.427 | 1.762 | 133.9              | -1.5               | -16.3              | 3.409                                            | 0.583                                            | 0.215                                             |
|                                                            | 532       | 1.611 | 1.469 | 1.974 |                    |                    |                    |                                                  |                                                  |                                                   |
| MIL-53(Al)-NH <sub>2</sub> /NO <sub>2</sub><br>Phase C     | $\infty$  | 1.539 | 1.416 | 1.722 | -51.3              | 1.1                | 7.6                | 1.954                                            | 0.208                                            | 0.062                                             |
|                                                            | 1064      | 1.553 | 1.427 | 1.762 | -134.2             | 1.5                | 16.2               | 3.394                                            | 0.576                                            | 0.212                                             |
|                                                            | 532       | 1.611 | 1.469 | 1.975 |                    |                    |                    |                                                  |                                                  |                                                   |
| MIL-53(Al)-NH <sub>2</sub> /NO <sub>2</sub><br>A/C (61:39) | $\infty$  | 1.539 | 1.416 | 1.721 | 11.2               | -0.2               | -1.7               | 0.426                                            | 0.045                                            | 0.013                                             |
|                                                            | 1064      | 1.553 | 1.427 | 1.762 | 29.3               | -0.3               | -3.6               | 0.751                                            | 0.131                                            | 0.048                                             |
|                                                            | 532       | 1.611 | 1.469 | 1.974 |                    |                    |                    |                                                  |                                                  |                                                   |
| MIL-53(Al)-NH <sub>2</sub> (vnp)                           | $\infty$  | 1.759 | 1.445 | 1.912 | 3.9                | -8.1               | -5.6               | 1.264                                            | 0.111                                            | 0.033                                             |
|                                                            | 1064      | 1.780 | 1.454 | 1.949 | 6.2                | -15.8              | -6.6               | 2.130                                            | 0.440                                            | 0.178                                             |
|                                                            | 532       | 1.862 | 1.496 | 2.116 |                    |                    |                    |                                                  |                                                  |                                                   |

**Table S8.** MP2/LFT results for MIL-53(Ga)-NH<sub>2</sub>/NO<sub>2</sub>: refractive indices, selected  $\chi^{(2)}$  tensor components (pm/V), and  $\langle d_{eff} \rangle$  (pm/V) for different grain sizes at different wavelengths (nm). The results are listed for the pure A and C phases as well as for the A/C mixture (A:C = 68:32 as obtained from XRD analysis).

| Compound and phase                                         | $\lambda$ | $n_1$ | $n_2$ | $n_3$ | $\chi_{333}^{(2)}$ | $\chi_{111}^{(2)}$ | $\chi_{133}^{(2)}$ | $\chi_{113}^{(2)}$ | $\langle d_{eff} \rangle$<br>r = 0 $\mu\text{m}$ | $\langle d_{eff} \rangle$<br>r = 3 $\mu\text{m}$ | $\langle d_{eff} \rangle$<br>r = 10 $\mu\text{m}$ |
|------------------------------------------------------------|-----------|-------|-------|-------|--------------------|--------------------|--------------------|--------------------|--------------------------------------------------|--------------------------------------------------|---------------------------------------------------|
| MIL-53(Ga)-NH <sub>2</sub> /NO <sub>2</sub><br>Phase A     | $\infty$  | 1.708 | 1.380 | 1.480 | -1.9               | 69.0               | -2.2               | 4.5                | 1.752                                            | 0.171                                            | 0.053                                             |
|                                                            | 1064      | 1.757 | 1.389 | 1.494 | -4.4               | 222.2              | -6.9               | 13.3               | 2.952                                            | 0.541                                            | 0.209                                             |
|                                                            | 532       | 2.062 | 1.436 | 1.560 |                    |                    |                    |                    |                                                  |                                                  |                                                   |
| MIL-53(Ga)-NH <sub>2</sub> /NO <sub>2</sub><br>Phase C     | $\infty$  | 1.668 | 1.373 | 1.469 | 2.0                | -47.7              | 2.1                | -3.2               | 1.428                                            | 0.166                                            | 0.049                                             |
|                                                            | 1064      | 1.703 | 1.383 | 1.488 | 4.3                | -147.1             | 7.0                | -4.9               | 3.089                                            | 0.828                                            | 0.332                                             |
|                                                            | 532       | 1.922 | 1.436 | 1.582 |                    |                    |                    |                    |                                                  |                                                  |                                                   |
| MIL-53(Ga)-NH <sub>2</sub> /NO <sub>2</sub><br>A/C (68:32) | $\infty$  | 1.695 | 1.378 | 1.477 | -0.5               | 31.8               | -1.0               | 1.0                | 0.715                                            | 0.076                                            | 0.023                                             |
|                                                            | 1064      | 1.740 | 1.387 | 1.493 | -1.3               | 105.0              | -3.2               | 1.9                | 1.221                                            | 0.272                                            | 0.107                                             |
|                                                            | 532       | 2.014 | 1.436 | 1.574 |                    |                    |                    |                    |                                                  |                                                  |                                                   |



0  $\mu\text{m}$

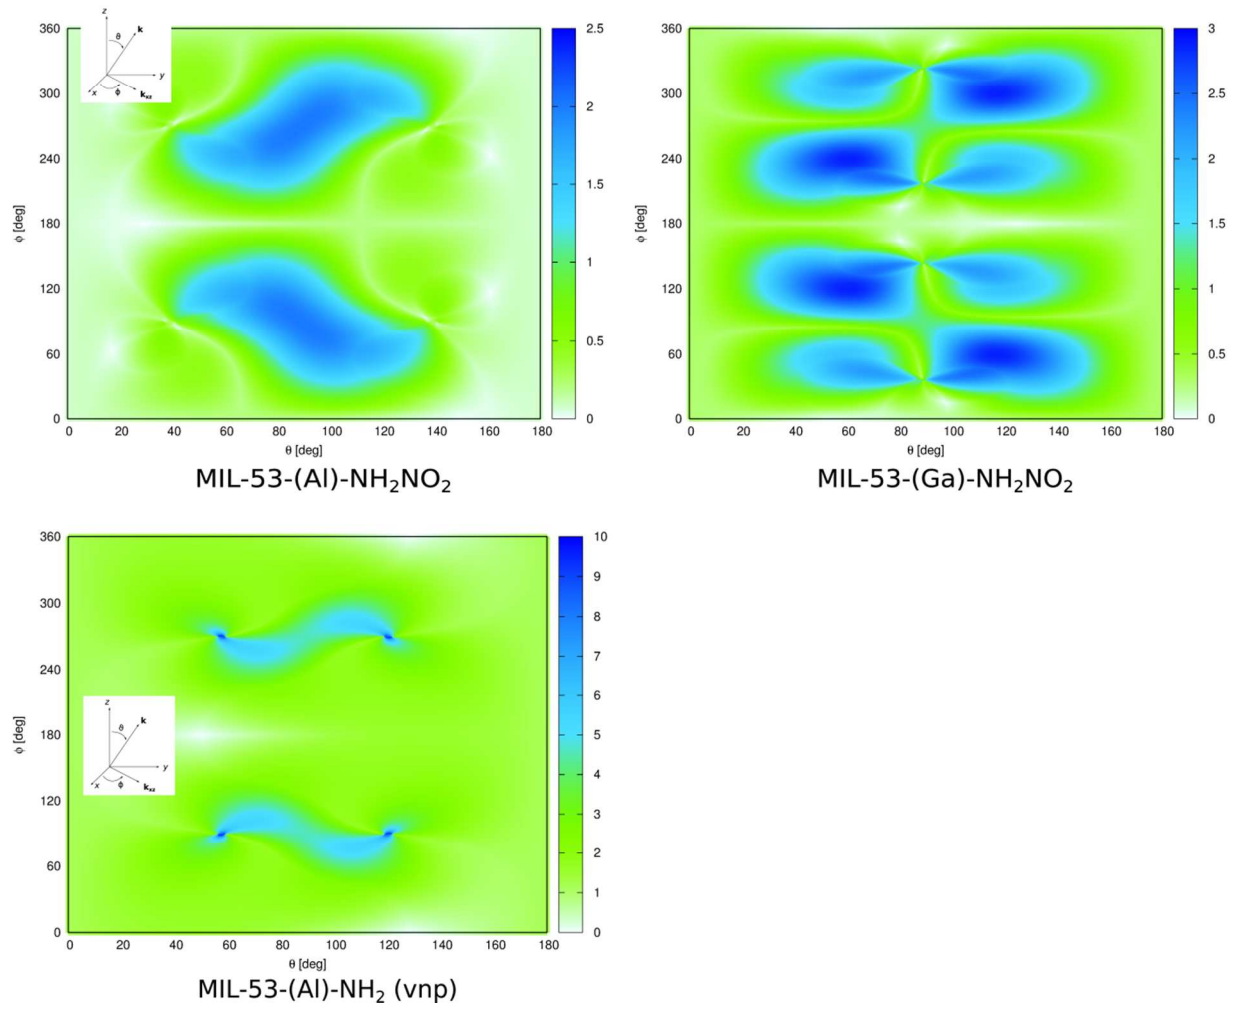

**Figure S31.** Angular dependence of the calculated  $d_{\text{eff}}$  (in pm/V) for MIL-53-(Al)-NH<sub>2</sub>/NO<sub>2</sub>, MIL-53(Ga)-NH<sub>2</sub>/NO<sub>2</sub>, and MIL-53(Al)-NH<sub>2</sub> (vnp) at  $\lambda = 1064$  nm for  $r = 0$   $\mu\text{m}$  (the inset gives the definition of the polar angles  $(\theta, \phi)$ , k being the wave vector of light, corresponding to the direction of propagation).

3  $\mu\text{m}$

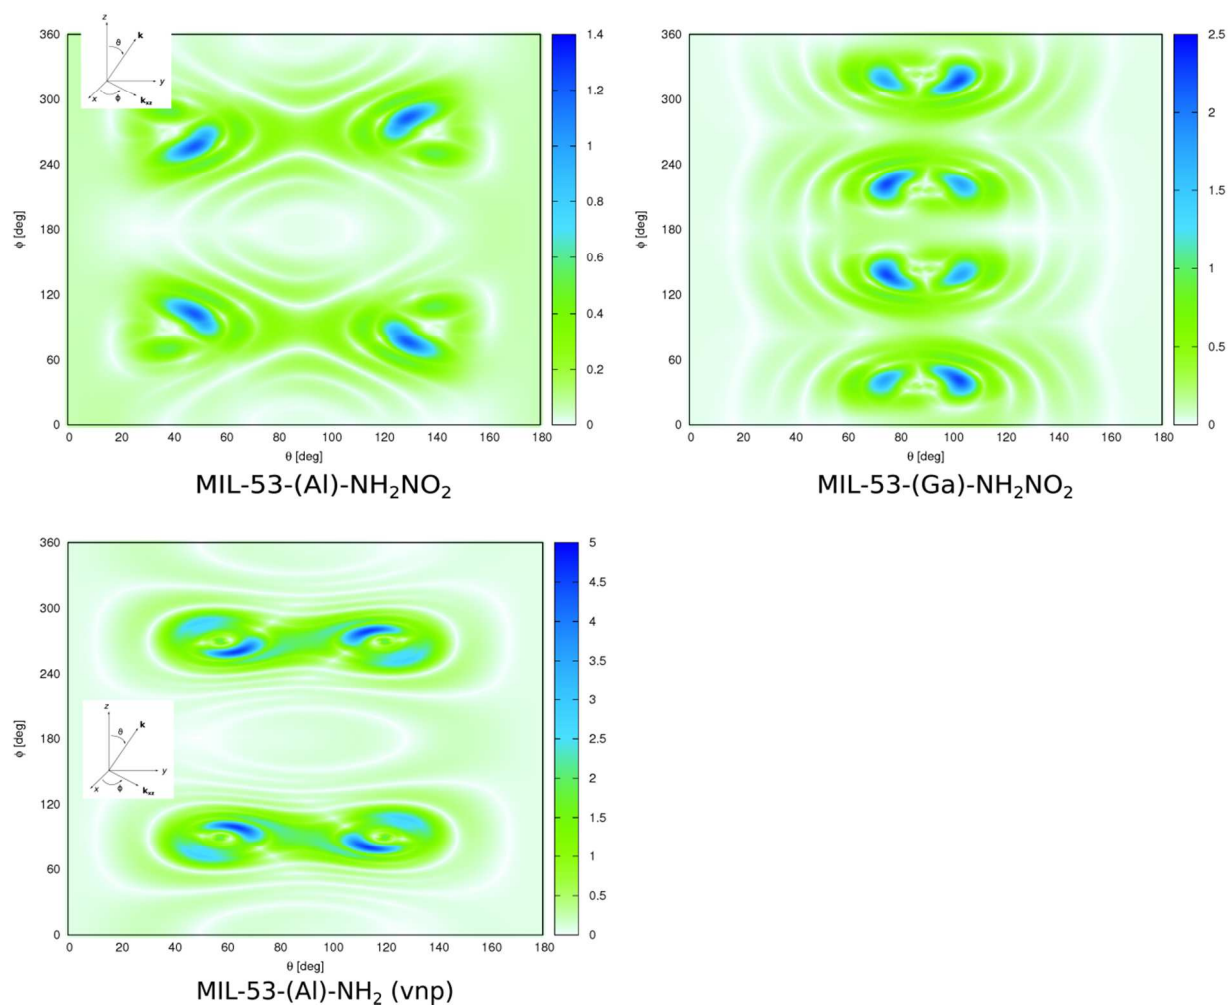

**Figure S32.** Angular dependence of the calculated  $d_{\text{eff}}$  (in pm/V) for MIL-53-(Al)-NH<sub>2</sub>/NO<sub>2</sub>, MIL-53(Ga)-NH<sub>2</sub>/NO<sub>2</sub>, and MIL-53(Al)-NH<sub>2</sub> (vnp) at  $\lambda = 1064$  nm for  $r = 3$   $\mu\text{m}$  (the inset gives the definition of the polar angles  $(\theta, \phi)$ ,  $\mathbf{k}$  being the wave vector of light, corresponding to the direction of propagation).

10  $\mu\text{m}$

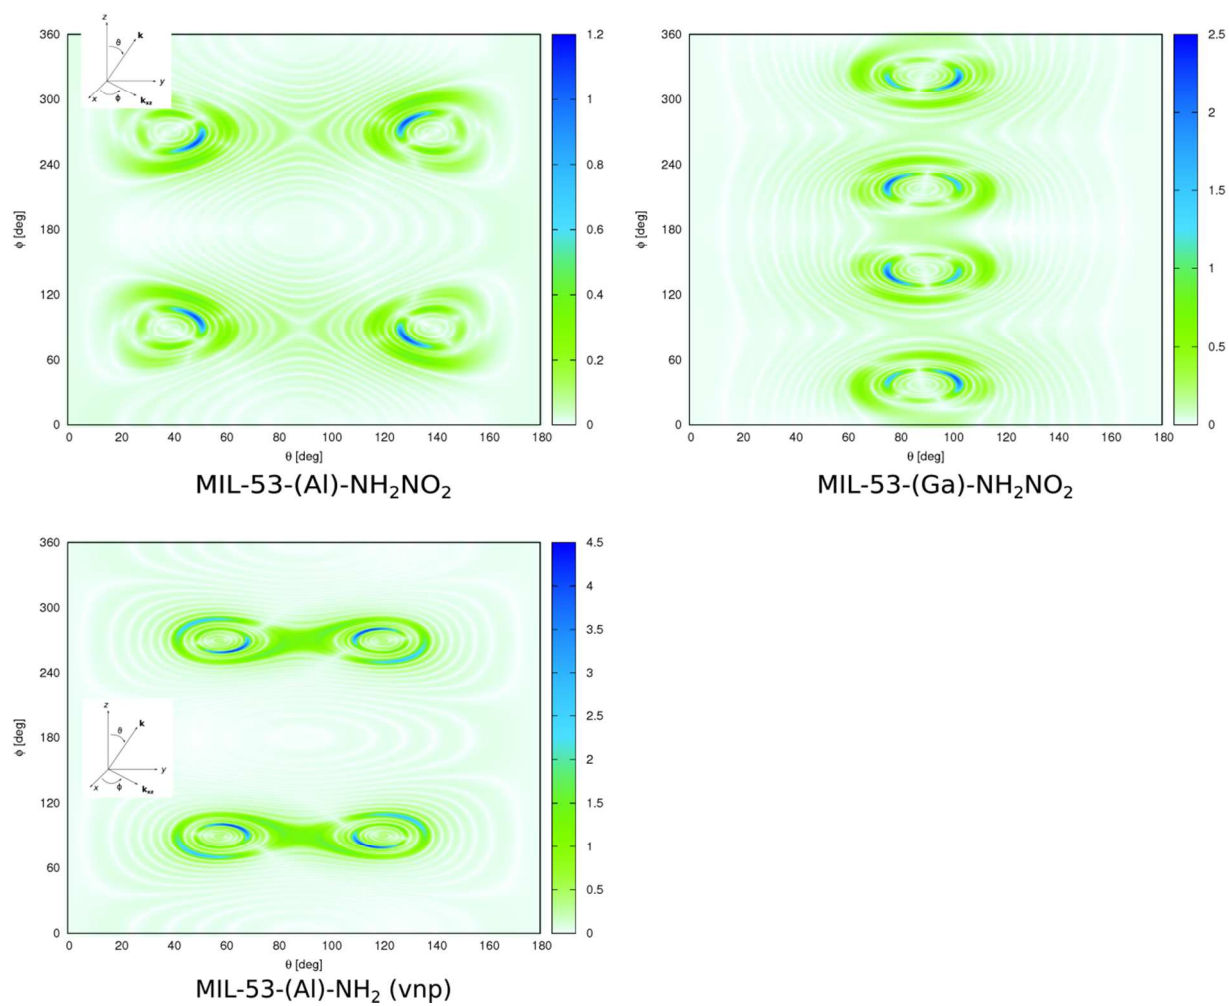

**Figure S33.** Angular dependence of the calculated  $d_{\text{eff}}$  (in pm/V) for MIL-53-(Al)-NH<sub>2</sub>/NO<sub>2</sub>, MIL-53(Ga)-NH<sub>2</sub>/NO<sub>2</sub>, and MIL-53(Al)-NH<sub>2</sub> (vnp) at  $\lambda=1064$  nm for  $r = 10 \mu\text{m}$  (bottom) (the inset gives the definition of the polar angles  $(\theta, \phi)$ ,  $k$  being the wave vector of light, corresponding to the direction of propagation).

## Estimation of the transmittance of 400 nm light through MIL-53(Al)-NH<sub>2</sub>-NO<sub>2</sub> crystals

To estimate the transmittance of the generated 400 nm SHG light through the MIL-53(Al)-NH<sub>2</sub>-NO<sub>2</sub> crystals we can use the law of Lambert Beer:

$$A = \epsilon lc = \log \frac{I_0}{I} = \log \frac{1}{T} \quad [1]$$

With:  $A$  the absorbance

$T$  the transmittance

$\epsilon$  the molar extinction coefficient

$l$  the path length of the beam of light through the material sample

$c$  the amount concentration of the attenuating species in the material sample

$I_0$  the incident intensity

$I$  the transmitted intensity

To calculate the transmittance  $T$ , we can convert formula [1] to:

$$T = 10^{-\epsilon lc} \quad [2]$$

For MIL-53(Al)-NH<sub>2</sub>-NO<sub>2</sub> crystals, the transmittance  $T$  can be estimated using the following values:

- For the molar extinction coefficient, we use the molar extinction coefficient of PNA:  
 $\epsilon_{400 \text{ nm}}(\text{PNA}) = 12300 \frac{\text{L}}{\text{mol.cm}}$  determined by Bru et al. for free PNA in water<sup>17</sup>
- The average path length of generated 400 nm SHG light in MIL-53(Al)-NH<sub>2</sub>-NO<sub>2</sub> crystals with an average height of 2  $\mu\text{m}$  is:  $l = 1 \mu\text{m}$
- The concentration relates to the number density through the following equation:

$$c = \frac{n}{N_A} \quad [3]$$

With:  $n$  the number density of the attenuating species in the material sample

$N_A$  the Avogadro constant =  $6.022 \times 10^{23} \text{ mol}^{-1}$

- The number density of the linker with PNA motif in MIL-53(Al)-NH<sub>2</sub>-NO<sub>2</sub> can be derived from the crystal structure:  $n = \frac{4 \text{ molecules}}{1438.18 \text{ \AA}^3}$

With these values we can estimate the transmittance of generated 400 nm SHG light through MIL-53(Al)-NH<sub>2</sub>-NO<sub>2</sub> crystals with a thickness of 2  $\mu\text{m}$  to be  $2.1 \times 10^{-4} \%$ :

$$T = 10^{-\epsilon lc}$$

$$T = 10^{-\left[12300 \frac{L}{\text{mol cm}} \cdot 1 \mu\text{m} \cdot \frac{4}{1438,18} \frac{\text{molecules}}{\text{\AA}^3} \cdot \frac{1}{6,022 \cdot 10^{23}} \frac{\text{mol}}{\text{molecules}}\right]}$$

$$T = 10^{-\left[12300 \frac{L}{\text{mol cm}} \cdot \frac{1 \text{dm}^3}{1 L} \cdot 1 \mu\text{m} \cdot \frac{10^{-4} \text{cm}}{1 \mu\text{m}} \cdot \frac{4}{1438,18} \frac{\text{molecules}}{\text{\AA}^3} \cdot \frac{1}{10^{-27} \text{dm}^3} \cdot \frac{1}{6,022 \cdot 10^{23}} \frac{\text{mol}}{\text{molecules}}\right]}$$

$$T = 2,1 \cdot 10^{-6}$$

## UV-vis spectrum

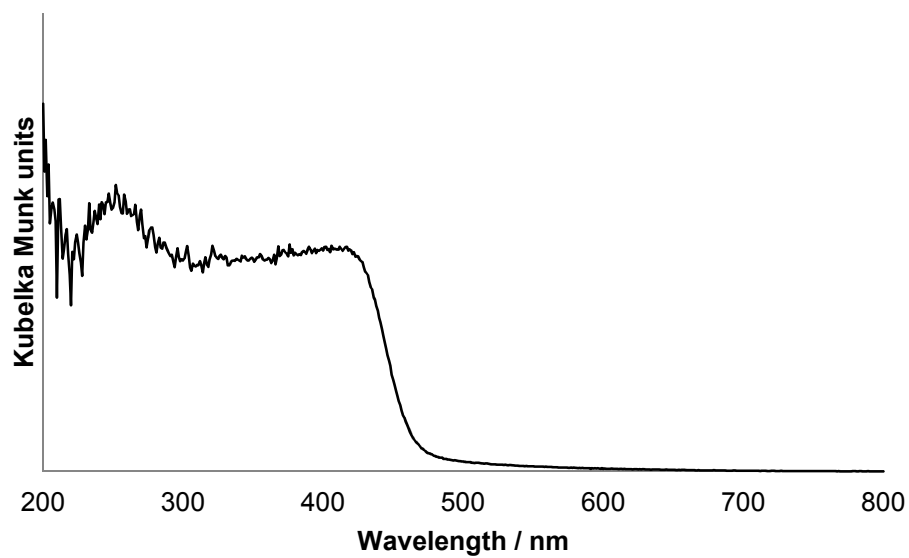

**Figure S34.** UV-vis spectrum of MIL-53-NH<sub>2</sub>/NO<sub>2</sub> (1). For the measurement, 5wt% of MIL-53-NH<sub>2</sub>/NO<sub>2</sub> in BaSO<sub>4</sub> was used. Reflectance data were converted with the Kubelka Munk equation:  $F(R) = (1-R)^2 / 2R$ .

## SHG of MIL-53(Al)-NH<sub>2</sub>/NO<sub>2</sub> (1) as a function of temperature

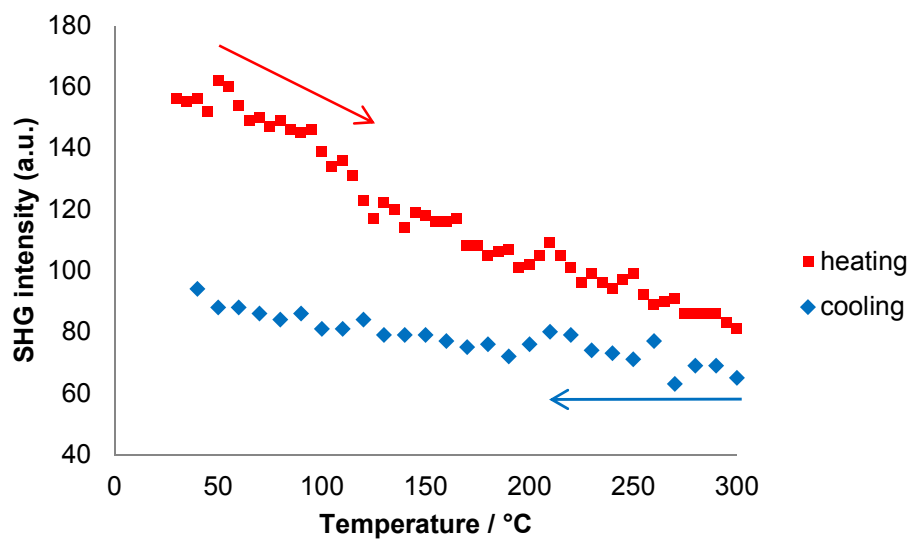

**Figure S35.** SHG intensity of MIL-53(Al)-NH<sub>2</sub>/NO<sub>2</sub> (1) during heating and cooling at a rate of 1 °C.min<sup>-1</sup> under N<sub>2</sub> flow. Between heating and cooling, the temperature was held constant at 300 °C overnight.

## Bibliography

- (1) Berbenni, V.; Milanese, C.; Bruni, G.; Marini, A. Thermal Decomposition of Gallium Nitrate Hydrate  $\text{Ga}(\text{NO}_3)_3 \cdot x\text{H}_2\text{O}$ . *J. Therm. Anal. Calorim.* **2005**, *82*, 401–407.
- (2) Serra-Crespo, P.; van der Veen, M. A.; Gobechiya, E.; Houthoofd, K.; Filinchuk, Y.; Kirschhock, C. E. A.; Martens, J. A.; Sels, B. F.; De Vos, D. E.; Kapteijn, F.; *et al.*  $\text{NH}_2\text{-MIL-53(Al)}$ : A High-Contrast Reversible Solid-State Nonlinear Optical Switch. *J. Am. Chem. Soc.* **2012**, *134*, 8314–8317.
- (3) Reinsch, H.; van der Veen, M. A.; Gil, B.; Marszalek, B.; Verbiest, T.; De Vos, D. E.; Stock, N. Structures, Sorption Characteristics, and Nonlinear Optical Properties of a New Series of Highly Stable Aluminum MOFs. *Chem. Mater.* **2013**, *25*, 17–26.
- (4) Horcajada, P.; Serre, C.; Grosso, D.; Boissière, C.; Perruchas, S.; Sanchez, C.; Férey, G. Colloidal Route for Preparing Optical Thin Films of Nanoporous Metal-Organic Frameworks. *Adv. Mater.* **2009**, *21*, 1931–1935.
- (5) Yang, L.-M.; Vajeeston, P.; Ravindran, P.; Fjellvåg, H.; Tilset, M. Theoretical Investigations on the Chemical Bonding, Electronic Structure, and Optical Properties of the Metal-Organic Framework MOF-5. *Inorg. Chem.* **2010**, *49*, 10283–10290.
- (6) Yang, L.-M.; Ravindran, P.; Vajeeston, P.; Tilset, M. Properties of IRMOF-14 and Its Analogues M-IRMOF-14 (M = Cd, Alkaline Earth Metals): Electronic Structure, Structural Stability, Chemical Bonding, and Optical Properties. *Phys. Chem. Chem. Phys. PCCP* **2012**, *14*, 4713–4723.
- (7) MUNN, R. W. A General Microscopic Theory of Bulk Second-Harmonic Generation from Molecular Crystals. *Mol. Phys.* **1996**, *89*, 555–569.
- (8) Kirtman, B.; Dykstra, C. E.; Champagne, B. Major Intermolecular Effects on Nonlinear Electrical Response in a Hexatriene Model of Solid State Polyacetylene. *Chem. Phys. Lett.* **1999**, *305*, 132–138.
- (9) Reis, H.; Papadopoulos, M. G.; Calaminici, P.; Jug, K.; Köster, A. M. Calculation of Macroscopic Linear and Nonlinear Optical Susceptibilities for the Naphthalene, Anthracene and Meta-Nitroaniline Crystals. *Chem. Phys.* **2000**, *261*, 359–371.
- (10) Seidler, T.; Stadnicka, K.; Champagne, B. Investigation of the Linear and Second-Order Nonlinear Optical Properties of Molecular Crystals within the Local Field Theory. *J. Chem. Phys.* **2013**, *139*, 114105.
- (11) Seidler, T.; Stadnicka, K.; Champagne, B. Second-Order Nonlinear Optical Susceptibilities and Refractive Indices of Organic Crystals from a Multiscale Numerical Simulation Approach. *Adv. Opt. Mater.* **2014**, *2*, 1000–1006.
- (12) Dovesi, R.; Orlando, R.; Erba, A.; Zicovich-Wilson, C. M.; Civalleri, B.; Casassa, S.; Maschio, L.; Ferrabone, M.; De La Pierre, M.; D'Arco, P.; *et al.* CRYSTAL14: A Program for the Ab Initio Investigation of Crystalline Solids. *Int. J. Quantum Chem.* **2014**, *114*, 1287–1317.
- (13) Seidler, T.; Champagne, B. Which Charge Definition for Describing the Crystal Polarizing Field and the  $\chi^{(1)}$  and  $\chi^{(2)}$  of Organic Crystals? *Phys. Chem. Chem. Phys.* **2015**, *17*, 19546–19556.
- (14) Sekino, H.; Bartlett, R. J. A Linear Response, Coupled-Cluster Theory for Excitation Energy. *Int. J. Quantum Chem.* **1984**, *26*, 255–265.
- (15) Seidler, T.; Champagne, B. Second-Order Nonlinear Optical Susceptibilities of Metal–Organic Frameworks Using a Combined Local Field Theory/Charge Embedding Electrostatic Scheme. *J. Phys. Chem. C* **2016**, *120*, 6741–6749.



- (16) Frisch, M. J.; Trucks, G. W.; Schlegel, H. B.; Scuseria, G. E.; Robb, M. A.; Cheeseman, J. R.; Scalmani, G.; Barone, V.; Mennucci, B.; Petersson, G. A.; *et al.* Gaussian 09, Revision B.01. *Gaussian 09, Revision B.01, Gaussian, Inc., Wallingford CT*, 2009.
- (17) Bru, R.; Walde, P. Product Inhibition of  $\alpha$ -Chymotrypsin in Reverse Micelles. *Eur. J. Biochem.* **1991**, *199*, 95–103.
